# Supplementary material
Source: publisher figshare collection journal article supplement (https://gsapubs.figshare.com/ndownloader/files/23318951)
Supplement: Supplementary file 1 [file 23318951]

## Sheet: Sheet1
Sample info						Whole-rock chemistry (wt %) from Hollings et al. 2005
Laser Site	Sample Name	Formation	Approx. Age	Easting	Northing	SiO2	TiO2	Al2O3	Fe2O3	MnO	MgO	CaO	K2O	Na2O	P2O5	LOI	Cr	Co	Ni	Rb	Sr	Cs	Ba	Sc	V	Ta	Nb	Zr	Hf	Th	U	Y	La	Ce	Pr	Nd	Sm	Eu	Gd	Tb	Dy	Ho	Er	Yb	Lu	Cu	Zn	Mo	Pb
CA28-FAR_06_01	CA28	Farellones	22-16 Ma	382881	6308109	63.55	0.73	17.07	5.37	0.11	2.27	3.86	2.08	4.58	0.37	2.97	2.06	6.06	1.34	43	438	0.54	470.6	11	73.3	0.36	5.05	156.7	4.34	4.43	1.21	17.9	19.58	43.8	5.41	23.7	4.75	1.37	4.18	0.64	3.59	0.75	2.05	2.01	0.3	69.7	11.5	1.01	8.97
CA28-FAR_07_01	CA28	Farellones	22-16 Ma	382881	6308109	63.55	0.73	17.07	5.37	0.11	2.27	3.86	2.08	4.58	0.37	2.97	2.06	6.06	1.34	43	438	0.54	470.6	11	73.3	0.36	5.05	156.7	4.34	4.43	1.21	17.9	19.58	43.8	5.41	23.7	4.75	1.37	4.18	0.64	3.59	0.75	2.05	2.01	0.3	69.7	11.5	1.01	8.97
CA28-FAR_09_01	CA28	Farellones	22-16 Ma	382881	6308109	63.55	0.73	17.07	5.37	0.11	2.27	3.86	2.08	4.58	0.37	2.97	2.06	6.06	1.34	43	438	0.54	470.6	11	73.3	0.36	5.05	156.7	4.34	4.43	1.21	17.9	19.58	43.8	5.41	23.7	4.75	1.37	4.18	0.64	3.59	0.75	2.05	2.01	0.3	69.7	11.5	1.01	8.97
CA28-FAR_10_01	CA28	Farellones	22-16 Ma	382881	6308109	63.55	0.73	17.07	5.37	0.11	2.27	3.86	2.08	4.58	0.37	2.97	2.06	6.06	1.34	43	438	0.54	470.6	11	73.3	0.36	5.05	156.7	4.34	4.43	1.21	17.9	19.58	43.8	5.41	23.7	4.75	1.37	4.18	0.64	3.59	0.75	2.05	2.01	0.3	69.7	11.5	1.01	8.97
CA28-FAR_15_01	CA28	Farellones	22-16 Ma	382881	6308109	63.55	0.73	17.07	5.37	0.11	2.27	3.86	2.08	4.58	0.37	2.97	2.06	6.06	1.34	43	438	0.54	470.6	11	73.3	0.36	5.05	156.7	4.34	4.43	1.21	17.9	19.58	43.8	5.41	23.7	4.75	1.37	4.18	0.64	3.59	0.75	2.05	2.01	0.3	69.7	11.5	1.01	8.97
CA28-FAR_16_01	CA28	Farellones	22-16 Ma	382881	6308109	63.55	0.73	17.07	5.37	0.11	2.27	3.86	2.08	4.58	0.37	2.97	2.06	6.06	1.34	43	438	0.54	470.6	11	73.3	0.36	5.05	156.7	4.34	4.43	1.21	17.9	19.58	43.8	5.41	23.7	4.75	1.37	4.18	0.64	3.59	0.75	2.05	2.01	0.3	69.7	11.5	1.01	8.97
CA28-FAR_16_02	CA28	Farellones	22-16 Ma	382881	6308109	63.55	0.73	17.07	5.37	0.11	2.27	3.86	2.08	4.58	0.37	2.97	2.06	6.06	1.34	43	438	0.54	470.6	11	73.3	0.36	5.05	156.7	4.34	4.43	1.21	17.9	19.58	43.8	5.41	23.7	4.75	1.37	4.18	0.64	3.59	0.75	2.05	2.01	0.3	69.7	11.5	1.01	8.97
CA28-FAR_17_01	CA28	Farellones	22-16 Ma	382881	6308109	63.55	0.73	17.07	5.37	0.11	2.27	3.86	2.08	4.58	0.37	2.97	2.06	6.06	1.34	43	438	0.54	470.6	11	73.3	0.36	5.05	156.7	4.34	4.43	1.21	17.9	19.58	43.8	5.41	23.7	4.75	1.37	4.18	0.64	3.59	0.75	2.05	2.01	0.3	69.7	11.5	1.01	8.97
CA28-FAR_17_02	CA28	Farellones	22-16 Ma	382881	6308109	63.55	0.73	17.07	5.37	0.11	2.27	3.86	2.08	4.58	0.37	2.97	2.06	6.06	1.34	43	438	0.54	470.6	11	73.3	0.36	5.05	156.7	4.34	4.43	1.21	17.9	19.58	43.8	5.41	23.7	4.75	1.37	4.18	0.64	3.59	0.75	2.05	2.01	0.3	69.7	11.5	1.01	8.97
EMPA	CA28	Farellones	22-16 Ma	382881	6308109	63.55	0.73	17.07	5.37	0.11	2.27	3.86	2.08	4.58	0.37	2.97	2.06	6.06	1.34	43	438	0.54	470.6	11	73.3	0.36	5.05	156.7	4.34	4.43	1.21	17.9	19.58	43.8	5.41	23.7	4.75	1.37	4.18	0.64	3.59	0.75	2.05	2.01	0.3	69.7	11.5	1.01	8.97
EMPA	CA28	Farellones	22-16 Ma	382881	6308109	63.55	0.73	17.07	5.37	0.11	2.27	3.86	2.08	4.58	0.37	2.97	2.06	6.06	1.34	43	438	0.54	470.6	11	73.3	0.36	5.05	156.7	4.34	4.43	1.21	17.9	19.58	43.8	5.41	23.7	4.75	1.37	4.18	0.64	3.59	0.75	2.05	2.01	0.3	69.7	11.5	1.01	8.97
EMPA	CA28	Farellones	22-16 Ma	382881	6308109	63.55	0.73	17.07	5.37	0.11	2.27	3.86	2.08	4.58	0.37	2.97	2.06	6.06	1.34	43	438	0.54	470.6	11	73.3	0.36	5.05	156.7	4.34	4.43	1.21	17.9	19.58	43.8	5.41	23.7	4.75	1.37	4.18	0.64	3.59	0.75	2.05	2.01	0.3	69.7	11.5	1.01	8.97
EMPA	CA28	Farellones	22-16 Ma	382881	6308109	63.55	0.73	17.07	5.37	0.11	2.27	3.86	2.08	4.58	0.37	2.97	2.06	6.06	1.34	43	438	0.54	470.6	11	73.3	0.36	5.05	156.7	4.34	4.43	1.21	17.9	19.58	43.8	5.41	23.7	4.75	1.37	4.18	0.64	3.59	0.75	2.05	2.01	0.3	69.7	11.5	1.01	8.97
EMPA	CA28	Farellones	22-16 Ma	382881	6308109	63.55	0.73	17.07	5.37	0.11	2.27	3.86	2.08	4.58	0.37	2.97	2.06	6.06	1.34	43	438	0.54	470.6	11	73.3	0.36	5.05	156.7	4.34	4.43	1.21	17.9	19.58	43.8	5.41	23.7	4.75	1.37	4.18	0.64	3.59	0.75	2.05	2.01	0.3	69.7	11.5	1.01	8.97
EMPA	CA28	Farellones	22-16 Ma	382881	6308109	63.55	0.73	17.07	5.37	0.11	2.27	3.86	2.08	4.58	0.37	2.97	2.06	6.06	1.34	43	438	0.54	470.6	11	73.3	0.36	5.05	156.7	4.34	4.43	1.21	17.9	19.58	43.8	5.41	23.7	4.75	1.37	4.18	0.64	3.59	0.75	2.05	2.01	0.3	69.7	11.5	1.01	8.97
EMPA	CA28	Farellones	22-16 Ma	382881	6308109	63.55	0.73	17.07	5.37	0.11	2.27	3.86	2.08	4.58	0.37	2.97	2.06	6.06	1.34	43	438	0.54	470.6	11	73.3	0.36	5.05	156.7	4.34	4.43	1.21	17.9	19.58	43.8	5.41	23.7	4.75	1.37	4.18	0.64	3.59	0.75	2.05	2.01	0.3	69.7	11.5	1.01	8.97
EMPA	CA28	Farellones	22-16 Ma	382881	6308109	63.55	0.73	17.07	5.37	0.11	2.27	3.86	2.08	4.58	0.37	2.97	2.06	6.06	1.34	43	438	0.54	470.6	11	73.3	0.36	5.05	156.7	4.34	4.43	1.21	17.9	19.58	43.8	5.41	23.7	4.75	1.37	4.18	0.64	3.59	0.75	2.05	2.01	0.3	69.7	11.5	1.01	8.97
CA29_FAR_08_01	CA29	Farellones	22-16 Ma	378555	6307593	56.77	1.15	18.28	9.87	0.22	1.91	5.1	1.45	4.89	0.38	2.41	3.07	14.77	2.77	17	402	0.37	662.5	22	102.6	0.35	4.71	156.7	4.4	3.96	0.9	33.5	17.42	42.83	5.38	26.85	5.65	1.7	5.77	0.94	5.62	1.2	3.33	3.25	0.47	76.9	17.8	0.85	7.07
CA29_FAR_09_05	CA29	Farellones	22-16 Ma	378555	6307593	56.77	1.15	18.28	9.87	0.22	1.91	5.1	1.45	4.89	0.38	2.41	3.07	14.77	2.77	17	402	0.37	662.5	22	102.6	0.35	4.71	156.7	4.4	3.96	0.9	33.5	17.42	42.83	5.38	26.85	5.65	1.7	5.77	0.94	5.62	1.2	3.33	3.25	0.47	76.9	17.8	0.85	7.07
CA29_FAR_13_01	CA29	Farellones	22-16 Ma	378555	6307593	56.77	1.15	18.28	9.87	0.22	1.91	5.1	1.45	4.89	0.38	2.41	3.07	14.77	2.77	17	402	0.37	662.5	22	102.6	0.35	4.71	156.7	4.4	3.96	0.9	33.5	17.42	42.83	5.38	26.85	5.65	1.7	5.77	0.94	5.62	1.2	3.33	3.25	0.47	76.9	17.8	0.85	7.07
CA29_FAR_14_02	CA29	Farellones	22-16 Ma	378555	6307593	56.77	1.15	18.28	9.87	0.22	1.91	5.1	1.45	4.89	0.38	2.41	3.07	14.77	2.77	17	402	0.37	662.5	22	102.6	0.35	4.71	156.7	4.4	3.96	0.9	33.5	17.42	42.83	5.38	26.85	5.65	1.7	5.77	0.94	5.62	1.2	3.33	3.25	0.47	76.9	17.8	0.85	7.07
CA29_FAR_14_07	CA29	Farellones	22-16 Ma	378555	6307593	56.77	1.15	18.28	9.87	0.22	1.91	5.1	1.45	4.89	0.38	2.41	3.07	14.77	2.77	17	402	0.37	662.5	22	102.6	0.35	4.71	156.7	4.4	3.96	0.9	33.5	17.42	42.83	5.38	26.85	5.65	1.7	5.77	0.94	5.62	1.2	3.33	3.25	0.47	76.9	17.8	0.85	7.07
CA29_FAR_14_10	CA29	Farellones	22-16 Ma	378555	6307593	56.77	1.15	18.28	9.87	0.22	1.91	5.1	1.45	4.89	0.38	2.41	3.07	14.77	2.77	17	402	0.37	662.5	22	102.6	0.35	4.71	156.7	4.4	3.96	0.9	33.5	17.42	42.83	5.38	26.85	5.65	1.7	5.77	0.94	5.62	1.2	3.33	3.25	0.47	76.9	17.8	0.85	7.07
CA29_FAR_14_11	CA29	Farellones	22-16 Ma	378555	6307593	56.77	1.15	18.28	9.87	0.22	1.91	5.1	1.45	4.89	0.38	2.41	3.07	14.77	2.77	17	402	0.37	662.5	22	102.6	0.35	4.71	156.7	4.4	3.96	0.9	33.5	17.42	42.83	5.38	26.85	5.65	1.7	5.77	0.94	5.62	1.2	3.33	3.25	0.47	76.9	17.8	0.85	7.07
CA29_FAR_15_01	CA29	Farellones	22-16 Ma	378555	6307593	56.77	1.15	18.28	9.87	0.22	1.91	5.1	1.45	4.89	0.38	2.41	3.07	14.77	2.77	17	402	0.37	662.5	22	102.6	0.35	4.71	156.7	4.4	3.96	0.9	33.5	17.42	42.83	5.38	26.85	5.65	1.7	5.77	0.94	5.62	1.2	3.33	3.25	0.47	76.9	17.8	0.85	7.07
CA29_FAR_15_02	CA29	Farellones	22-16 Ma	378555	6307593	56.77	1.15	18.28	9.87	0.22	1.91	5.1	1.45	4.89	0.38	2.41	3.07	14.77	2.77	17	402	0.37	662.5	22	102.6	0.35	4.71	156.7	4.4	3.96	0.9	33.5	17.42	42.83	5.38	26.85	5.65	1.7	5.77	0.94	5.62	1.2	3.33	3.25	0.47	76.9	17.8	0.85	7.07
CA29_FAR_17_03	CA29	Farellones	22-16 Ma	378555	6307593	56.77	1.15	18.28	9.87	0.22	1.91	5.1	1.45	4.89	0.38	2.41	3.07	14.77	2.77	17	402	0.37	662.5	22	102.6	0.35	4.71	156.7	4.4	3.96	0.9	33.5	17.42	42.83	5.38	26.85	5.65	1.7	5.77	0.94	5.62	1.2	3.33	3.25	0.47	76.9	17.8	0.85	7.07
CA29_FAR_18_01	CA29	Farellones	22-16 Ma	378555	6307593	56.77	1.15	18.28	9.87	0.22	1.91	5.1	1.45	4.89	0.38	2.41	3.07	14.77	2.77	17	402	0.37	662.5	22	102.6	0.35	4.71	156.7	4.4	3.96	0.9	33.5	17.42	42.83	5.38	26.85	5.65	1.7	5.77	0.94	5.62	1.2	3.33	3.25	0.47	76.9	17.8	0.85	7.07
CA29_FAR_18_02	CA29	Farellones	22-16 Ma	378555	6307593	56.77	1.15	18.28	9.87	0.22	1.91	5.1	1.45	4.89	0.38	2.41	3.07	14.77	2.77	17	402	0.37	662.5	22	102.6	0.35	4.71	156.7	4.4	3.96	0.9	33.5	17.42	42.83	5.38	26.85	5.65	1.7	5.77	0.94	5.62	1.2	3.33	3.25	0.47	76.9	17.8	0.85	7.07
EMPA	CA29	Farellones	22-16 Ma	378555	6307593	56.77	1.15	18.28	9.87	0.22	1.91	5.1	1.45	4.89	0.38	2.41	3.07	14.77	2.77	17	402	0.37	662.5	22	102.6	0.35	4.71	156.7	4.4	3.96	0.9	33.5	17.42	42.83	5.38	26.85	5.65	1.7	5.77	0.94	5.62	1.2	3.33	3.25	0.47	76.9	17.8	0.85	7.07
EMPA	CA29	Farellones	22-16 Ma	378555	6307593	56.77	1.15	18.28	9.87	0.22	1.91	5.1	1.45	4.89	0.38	2.41	3.07	14.77	2.77	17	402	0.37	662.5	22	102.6	0.35	4.71	156.7	4.4	3.96	0.9	33.5	17.42	42.83	5.38	26.85	5.65	1.7	5.77	0.94	5.62	1.2	3.33	3.25	0.47	76.9	17.8	0.85	7.07
EMPA	CA29	Farellones	22-16 Ma	378555	6307593	56.77	1.15	18.28	9.87	0.22	1.91	5.1	1.45	4.89	0.38	2.41	3.07	14.77	2.77	17	402	0.37	662.5	22	102.6	0.35	4.71	156.7	4.4	3.96	0.9	33.5	17.42	42.83	5.38	26.85	5.65	1.7	5.77	0.94	5.62	1.2	3.33	3.25	0.47	76.9	17.8	0.85	7.07
EMPA	CA29	Farellones	22-16 Ma	378555	6307593	56.77	1.15	18.28	9.87	0.22	1.91	5.1	1.45	4.89	0.38	2.41	3.07	14.77	2.77	17	402	0.37	662.5	22	102.6	0.35	4.71	156.7	4.4	3.96	0.9	33.5	17.42	42.83	5.38	26.85	5.65	1.7	5.77	0.94	5.62	1.2	3.33	3.25	0.47	76.9	17.8	0.85	7.07
EMPA	CA29	Farellones	22-16 Ma	378555	6307593	56.77	1.15	18.28	9.87	0.22	1.91	5.1	1.45	4.89	0.38	2.41	3.07	14.77	2.77	17	402	0.37	662.5	22	102.6	0.35	4.71	156.7	4.4	3.96	0.9	33.5	17.42	42.83	5.38	26.85	5.65	1.7	5.77	0.94	5.62	1.2	3.33	3.25	0.47	76.9	17.8	0.85	7.07
EMPA	CA29	Farellones	22-16 Ma	378555	6307593	56.77	1.15	18.28	9.87	0.22	1.91	5.1	1.45	4.89	0.38	2.41	3.07	14.77	2.77	17	402	0.37	662.5	22	102.6	0.35	4.71	156.7	4.4	3.96	0.9	33.5	17.42	42.83	5.38	26.85	5.65	1.7	5.77	0.94	5.62	1.2	3.33	3.25	0.47	76.9	17.8	0.85	7.07
EMPA	CA29	Farellones	22-16 Ma	378555	6307593	56.77	1.15	18.28	9.87	0.22	1.91	5.1	1.45	4.89	0.38	2.41	3.07	14.77	2.77	17	402	0.37	662.5	22	102.6	0.35	4.71	156.7	4.4	3.96	0.9	33.5	17.42	42.83	5.38	26.85	5.65	1.7	5.77	0.94	5.62	1.2	3.33	3.25	0.47	76.9	17.8	0.85	7.07
EMPA	CA29	Farellones	22-16 Ma	378555	6307593	56.77	1.15	18.28	9.87	0.22	1.91	5.1	1.45	4.89	0.38	2.41	3.07	14.77	2.77	17	402	0.37	662.5	22	102.6	0.35	4.71	156.7	4.4	3.96	0.9	33.5	17.42	42.83	5.38	26.85	5.65	1.7	5.77	0.94	5.62	1.2	3.33	3.25	0.47	76.9	17.8	0.85	7.07
EMPA	CA29	Farellones	22-16 Ma	378555	6307593	56.77	1.15	18.28	9.87	0.22	1.91	5.1	1.45	4.89	0.38	2.41	3.07	14.77	2.77	17	402	0.37	662.5	22	102.6	0.35	4.71	156.7	4.4	3.96	0.9	33.5	17.42	42.83	5.38	26.85	5.65	1.7	5.77	0.94	5.62	1.2	3.33	3.25	0.47	76.9	17.8	0.85	7.07
EMPA	CA29	Farellones	22-16 Ma	378555	6307593	56.77	1.15	18.28	9.87	0.22	1.91	5.1	1.45	4.89	0.38	2.41	3.07	14.77	2.77	17	402	0.37	662.5	22	102.6	0.35	4.71	156.7	4.4	3.96	0.9	33.5	17.42	42.83	5.38	26.85	5.65	1.7	5.77	0.94	5.62	1.2	3.33	3.25	0.47	76.9	17.8	0.85	7.07
EMPA	CA29	Farellones	22-16 Ma	378555	6307593	56.77	1.15	18.28	9.87	0.22	1.91	5.1	1.45	4.89	0.38	2.41	3.07	14.77	2.77	17	402	0.37	662.5	22	102.6	0.35	4.71	156.7	4.4	3.96	0.9	33.5	17.42	42.83	5.38	26.85	5.65	1.7	5.77	0.94	5.62	1.2	3.33	3.25	0.47	76.9	17.8	0.85	7.07
EMPA	CA29	Farellones	22-16 Ma	378555	6307593	56.77	1.15	18.28	9.87	0.22	1.91	5.1	1.45	4.89	0.38	2.41	3.07	14.77	2.77	17	402	0.37	662.5	22	102.6	0.35	4.71	156.7	4.4	3.96	0.9	33.5	17.42	42.83	5.38	26.85	5.65	1.7	5.77	0.94	5.62	1.2	3.33	3.25	0.47	76.9	17.8	0.85	7.07
EMPA	CA29	Farellones	22-16 Ma	378555	6307593	56.77	1.15	18.28	9.87	0.22	1.91	5.1	1.45	4.89	0.38	2.41	3.07	14.77	2.77	17	402	0.37	662.5	22	102.6	0.35	4.71	156.7	4.4	3.96	0.9	33.5	17.42	42.83	5.38	26.85	5.65	1.7	5.77	0.94	5.62	1.2	3.33	3.25	0.47	76.9	17.8	0.85	7.07
EMPA	CA29	Farellones	22-16 Ma	378555	6307593	56.77	1.15	18.28	9.87	0.22	1.91	5.1	1.45	4.89	0.38	2.41	3.07	14.77	2.77	17	402	0.37	662.5	22	102.6	0.35	4.71	156.7	4.4	3.96	0.9	33.5	17.42	42.83	5.38	26.85	5.65	1.7	5.77	0.94	5.62	1.2	3.33	3.25	0.47	76.9	17.8	0.85	7.07
EMPA	CA29	Farellones	22-16 Ma	378555	6307593	56.77	1.15	18.28	9.87	0.22	1.91	5.1	1.45	4.89	0.38	2.41	3.07	14.77	2.77	17	402	0.37	662.5	22	102.6	0.35	4.71	156.7	4.4	3.96	0.9	33.5	17.42	42.83	5.38	26.85	5.65	1.7	5.77	0.94	5.62	1.2	3.33	3.25	0.47	76.9	17.8	0.85	7.07
EMPA	CA29	Farellones	22-16 Ma	378555	6307593	56.77	1.15	18.28	9.87	0.22	1.91	5.1	1.45	4.89	0.38	2.41	3.07	14.77	2.77	17	402	0.37	662.5	22	102.6	0.35	4.71	156.7	4.4	3.96	0.9	33.5	17.42	42.83	5.38	26.85	5.65	1.7	5.77	0.94	5.62	1.2	3.33	3.25	0.47	76.9	17.8	0.85	7.07
EMPA	CA29	Farellones	22-16 Ma	378555	6307593	56.77	1.15	18.28	9.87	0.22	1.91	5.1	1.45	4.89	0.38	2.41	3.07	14.77	2.77	17	402	0.37	662.5	22	102.6	0.35	4.71	156.7	4.4	3.96	0.9	33.5	17.42	42.83	5.38	26.85	5.65	1.7	5.77	0.94	5.62	1.2	3.33	3.25	0.47	76.9	17.8	0.85	7.07
EMPA	CA29	Farellones	22-16 Ma	378555	6307593	56.77	1.15	18.28	9.87	0.22	1.91	5.1	1.45	4.89	0.38	2.41	3.07	14.77	2.77	17	402	0.37	662.5	22	102.6	0.35	4.71	156.7	4.4	3.96	0.9	33.5	17.42	42.83	5.38	26.85	5.65	1.7	5.77	0.94	5.62	1.2	3.33	3.25	0.47	76.9	17.8	0.85	7.07
EMPA	CA29	Farellones	22-16 Ma	378555	6307593	56.77	1.15	18.28	9.87	0.22	1.91	5.1	1.45	4.89	0.38	2.41	3.07	14.77	2.77	17	402	0.37	662.5	22	102.6	0.35	4.71	156.7	4.4	3.96	0.9	33.5	17.42	42.83	5.38	26.85	5.65	1.7	5.77	0.94	5.62	1.2	3.33	3.25	0.47	76.9	17.8	0.85	7.07
CA30_FAR_06_01	CA30	La Copa Rhyolite	4.9-3.9 Ma	381726	6332690	70.78	0.21	16.72	1.41	0.04	0.44	2.35	2.71	5.27	0.07	2.17	3.07	2.46	1.84	108	788	39.97	816.6	2.7	23.6	0.24	2.66	99.4	2.75	1.74	1.44	4.3	10.12	20.75	2.33	7.67	1.7	0.51	1.16	0.18	0.84	0.17	0.42	0.45	0.07	85.3	52.2	0.75	17.99
CA30_FAR_06_03	CA30	La Copa Rhyolite	4.9-3.9 Ma	381726	6332690	70.78	0.21	16.72	1.41	0.04	0.44	2.35	2.71	5.27	0.07	2.17	3.07	2.46	1.84	108	788	39.97	816.6	2.7	23.6	0.24	2.66	99.4	2.75	1.74	1.44	4.3	10.12	20.75	2.33	7.67	1.7	0.51	1.16	0.18	0.84	0.17	0.42	0.45	0.07	85.3	52.2	0.75	17.99
CA30_FAR_06_04	CA30	La Copa Rhyolite	4.9-3.9 Ma	381726	6332690	70.78	0.21	16.72	1.41	0.04	0.44	2.35	2.71	5.27	0.07	2.17	3.07	2.46	1.84	108	788	39.97	816.6	2.7	23.6	0.24	2.66	99.4	2.75	1.74	1.44	4.3	10.12	20.75	2.33	7.67	1.7	0.51	1.16	0.18	0.84	0.17	0.42	0.45	0.07	85.3	52.2	0.75	17.99
CA30_FAR_07_01	CA30	La Copa Rhyolite	4.9-3.9 Ma	381726	6332690	70.78	0.21	16.72	1.41	0.04	0.44	2.35	2.71	5.27	0.07	2.17	3.07	2.46	1.84	108	788	39.97	816.6	2.7	23.6	0.24	2.66	99.4	2.75	1.74	1.44	4.3	10.12	20.75	2.33	7.67	1.7	0.51	1.16	0.18	0.84	0.17	0.42	0.45	0.07	85.3	52.2	0.75	17.99
CA30_FAR_07_02	CA30	La Copa Rhyolite	4.9-3.9 Ma	381726	6332690	70.78	0.21	16.72	1.41	0.04	0.44	2.35	2.71	5.27	0.07	2.17	3.07	2.46	1.84	108	788	39.97	816.6	2.7	23.6	0.24	2.66	99.4	2.75	1.74	1.44	4.3	10.12	20.75	2.33	7.67	1.7	0.51	1.16	0.18	0.84	0.17	0.42	0.45	0.07	85.3	52.2	0.75	17.99
CA30_FAR_08_01	CA30	La Copa Rhyolite	4.9-3.9 Ma	381726	6332690	70.78	0.21	16.72	1.41	0.04	0.44	2.35	2.71	5.27	0.07	2.17	3.07	2.46	1.84	108	788	39.97	816.6	2.7	23.6	0.24	2.66	99.4	2.75	1.74	1.44	4.3	10.12	20.75	2.33	7.67	1.7	0.51	1.16	0.18	0.84	0.17	0.42	0.45	0.07	85.3	52.2	0.75	17.99
CA30_FAR_09_02	CA30	La Copa Rhyolite	4.9-3.9 Ma	381726	6332690	70.78	0.21	16.72	1.41	0.04	0.44	2.35	2.71	5.27	0.07	2.17	3.07	2.46	1.84	108	788	39.97	816.6	2.7	23.6	0.24	2.66	99.4	2.75	1.74	1.44	4.3	10.12	20.75	2.33	7.67	1.7	0.51	1.16	0.18	0.84	0.17	0.42	0.45	0.07	85.3	52.2	0.75	17.99
CA30_FAR_10_01	CA30	La Copa Rhyolite	4.9-3.9 Ma	381726	6332690	70.78	0.21	16.72	1.41	0.04	0.44	2.35	2.71	5.27	0.07	2.17	3.07	2.46	1.84	108	788	39.97	816.6	2.7	23.6	0.24	2.66	99.4	2.75	1.74	1.44	4.3	10.12	20.75	2.33	7.67	1.7	0.51	1.16	0.18	0.84	0.17	0.42	0.45	0.07	85.3	52.2	0.75	17.99
CA30_FAR_10_03	CA30	La Copa Rhyolite	4.9-3.9 Ma	381726	6332690	70.78	0.21	16.72	1.41	0.04	0.44	2.35	2.71	5.27	0.07	2.17	3.07	2.46	1.84	108	788	39.97	816.6	2.7	23.6	0.24	2.66	99.4	2.75	1.74	1.44	4.3	10.12	20.75	2.33	7.67	1.7	0.51	1.16	0.18	0.84	0.17	0.42	0.45	0.07	85.3	52.2	0.75	17.99
CA30_FAR_12_01	CA30	La Copa Rhyolite	4.9-3.9 Ma	381726	6332690	70.78	0.21	16.72	1.41	0.04	0.44	2.35	2.71	5.27	0.07	2.17	3.07	2.46	1.84	108	788	39.97	816.6	2.7	23.6	0.24	2.66	99.4	2.75	1.74	1.44	4.3	10.12	20.75	2.33	7.67	1.7	0.51	1.16	0.18	0.84	0.17	0.42	0.45	0.07	85.3	52.2	0.75	17.99
CA30_FAR_15_01	CA30	La Copa Rhyolite	4.9-3.9 Ma	381726	6332690	70.78	0.21	16.72	1.41	0.04	0.44	2.35	2.71	5.27	0.07	2.17	3.07	2.46	1.84	108	788	39.97	816.6	2.7	23.6	0.24	2.66	99.4	2.75	1.74	1.44	4.3	10.12	20.75	2.33	7.67	1.7	0.51	1.16	0.18	0.84	0.17	0.42	0.45	0.07	85.3	52.2	0.75	17.99
CA30_FAR_16_01	CA30	La Copa Rhyolite	4.9-3.9 Ma	381726	6332690	70.78	0.21	16.72	1.41	0.04	0.44	2.35	2.71	5.27	0.07	2.17	3.07	2.46	1.84	108	788	39.97	816.6	2.7	23.6	0.24	2.66	99.4	2.75	1.74	1.44	4.3	10.12	20.75	2.33	7.67	1.7	0.51	1.16	0.18	0.84	0.17	0.42	0.45	0.07	85.3	52.2	0.75	17.99
EMPA	CA30	La Copa Rhyolite	4.9-3.9 Ma	381726	6332690	70.78	0.21	16.72	1.41	0.04	0.44	2.35	2.71	5.27	0.07	2.17	3.07	2.46	1.84	108	788	39.97	816.6	2.7	23.6	0.24	2.66	99.4	2.75	1.74	1.44	4.3	10.12	20.75	2.33	7.67	1.7	0.51	1.16	0.18	0.84	0.17	0.42	0.45	0.07	85.3	52.2	0.75	17.99
EMPA	CA30	La Copa Rhyolite	4.9-3.9 Ma	381726	6332690	70.78	0.21	16.72	1.41	0.04	0.44	2.35	2.71	5.27	0.07	2.17	3.07	2.46	1.84	108	788	39.97	816.6	2.7	23.6	0.24	2.66	99.4	2.75	1.74	1.44	4.3	10.12	20.75	2.33	7.67	1.7	0.51	1.16	0.18	0.84	0.17	0.42	0.45	0.07	85.3	52.2	0.75	17.99
EMPA	CA30	La Copa Rhyolite	4.9-3.9 Ma	381726	6332690	70.78	0.21	16.72	1.41	0.04	0.44	2.35	2.71	5.27	0.07	2.17	3.07	2.46	1.84	108	788	39.97	816.6	2.7	23.6	0.24	2.66	99.4	2.75	1.74	1.44	4.3	10.12	20.75	2.33	7.67	1.7	0.51	1.16	0.18	0.84	0.17	0.42	0.45	0.07	85.3	52.2	0.75	17.99
EMPA	CA30	La Copa Rhyolite	4.9-3.9 Ma	381726	6332690	70.78	0.21	16.72	1.41	0.04	0.44	2.35	2.71	5.27	0.07	2.17	3.07	2.46	1.84	108	788	39.97	816.6	2.7	23.6	0.24	2.66	99.4	2.75	1.74	1.44	4.3	10.12	20.75	2.33	7.67	1.7	0.51	1.16	0.18	0.84	0.17	0.42	0.45	0.07	85.3	52.2	0.75	17.99
EMPA	CA30	La Copa Rhyolite	4.9-3.9 Ma	381726	6332690	70.78	0.21	16.72	1.41	0.04	0.44	2.35	2.71	5.27	0.07	2.17	3.07	2.46	1.84	108	788	39.97	816.6	2.7	23.6	0.24	2.66	99.4	2.75	1.74	1.44	4.3	10.12	20.75	2.33	7.67	1.7	0.51	1.16	0.18	0.84	0.17	0.42	0.45	0.07	85.3	52.2	0.75	17.99
EMPA	CA30	La Copa Rhyolite	4.9-3.9 Ma	381726	6332690	70.78	0.21	16.72	1.41	0.04	0.44	2.35	2.71	5.27	0.07	2.17	3.07	2.46	1.84	108	788	39.97	816.6	2.7	23.6	0.24	2.66	99.4	2.75	1.74	1.44	4.3	10.12	20.75	2.33	7.67	1.7	0.51	1.16	0.18	0.84	0.17	0.42	0.45	0.07	85.3	52.2	0.75	17.99
EMPA	CA30	La Copa Rhyolite	4.9-3.9 Ma	381726	6332690	70.78	0.21	16.72	1.41	0.04	0.44	2.35	2.71	5.27	0.07	2.17	3.07	2.46	1.84	108	788	39.97	816.6	2.7	23.6	0.24	2.66	99.4	2.75	1.74	1.44	4.3	10.12	20.75	2.33	7.67	1.7	0.51	1.16	0.18	0.84	0.17	0.42	0.45	0.07	85.3	52.2	0.75	17.99
EMPA	CA30	La Copa Rhyolite	4.9-3.9 Ma	381726	6332690	70.78	0.21	16.72	1.41	0.04	0.44	2.35	2.71	5.27	0.07	2.17	3.07	2.46	1.84	108	788	39.97	816.6	2.7	23.6	0.24	2.66	99.4	2.75	1.74	1.44	4.3	10.12	20.75	2.33	7.67	1.7	0.51	1.16	0.18	0.84	0.17	0.42	0.45	0.07	85.3	52.2	0.75	17.99
EMPA	CA30	La Copa Rhyolite	4.9-3.9 Ma	381726	6332690	70.78	0.21	16.72	1.41	0.04	0.44	2.35	2.71	5.27	0.07	2.17	3.07	2.46	1.84	108	788	39.97	816.6	2.7	23.6	0.24	2.66	99.4	2.75	1.74	1.44	4.3	10.12	20.75	2.33	7.67	1.7	0.51	1.16	0.18	0.84	0.17	0.42	0.45	0.07	85.3	52.2	0.75	17.99
EMPA	CA30	La Copa Rhyolite	4.9-3.9 Ma	381726	6332690	70.78	0.21	16.72	1.41	0.04	0.44	2.35	2.71	5.27	0.07	2.17	3.07	2.46	1.84	108	788	39.97	816.6	2.7	23.6	0.24	2.66	99.4	2.75	1.74	1.44	4.3	10.12	20.75	2.33	7.67	1.7	0.51	1.16	0.18	0.84	0.17	0.42	0.45	0.07	85.3	52.2	0.75	17.99
EMPA	CA30	La Copa Rhyolite	4.9-3.9 Ma	381726	6332690	70.78	0.21	16.72	1.41	0.04	0.44	2.35	2.71	5.27	0.07	2.17	3.07	2.46	1.84	108	788	39.97	816.6	2.7	23.6	0.24	2.66	99.4	2.75	1.74	1.44	4.3	10.12	20.75	2.33	7.67	1.7	0.51	1.16	0.18	0.84	0.17	0.42	0.45	0.07	85.3	52.2	0.75	17.99
EMPA	CA30	La Copa Rhyolite	4.9-3.9 Ma	381726	6332690	70.78	0.21	16.72	1.41	0.04	0.44	2.35	2.71	5.27	0.07	2.17	3.07	2.46	1.84	108	788	39.97	816.6	2.7	23.6	0.24	2.66	99.4	2.75	1.74	1.44	4.3	10.12	20.75	2.33	7.67	1.7	0.51	1.16	0.18	0.84	0.17	0.42	0.45	0.07	85.3	52.2	0.75	17.99
EMPA	CA30	La Copa Rhyolite	4.9-3.9 Ma	381726	6332690	70.78	0.21	16.72	1.41	0.04	0.44	2.35	2.71	5.27	0.07	2.17	3.07	2.46	1.84	108	788	39.97	816.6	2.7	23.6	0.24	2.66	99.4	2.75	1.74	1.44	4.3	10.12	20.75	2.33	7.67	1.7	0.51	1.16	0.18	0.84	0.17	0.42	0.45	0.07	85.3	52.2	0.75	17.99
EMPA	CA30	La Copa Rhyolite	4.9-3.9 Ma	381726	6332690	70.78	0.21	16.72	1.41	0.04	0.44	2.35	2.71	5.27	0.07	2.17	3.07	2.46	1.84	108	788	39.97	816.6	2.7	23.6	0.24	2.66	99.4	2.75	1.74	1.44	4.3	10.12	20.75	2.33	7.67	1.7	0.51	1.16	0.18	0.84	0.17	0.42	0.45	0.07	85.3	52.2	0.75	17.99
EMPA	CA30	La Copa Rhyolite	4.9-3.9 Ma	381726	6332690	70.78	0.21	16.72	1.41	0.04	0.44	2.35	2.71	5.27	0.07	2.17	3.07	2.46	1.84	108	788	39.97	816.6	2.7	23.6	0.24	2.66	99.4	2.75	1.74	1.44	4.3	10.12	20.75	2.33	7.67	1.7	0.51	1.16	0.18	0.84	0.17	0.42	0.45	0.07	85.3	52.2	0.75	17.99
EMPA	CA30	La Copa Rhyolite	4.9-3.9 Ma	381726	6332690	70.78	0.21	16.72	1.41	0.04	0.44	2.35	2.71	5.27	0.07	2.17	3.07	2.46	1.84	108	788	39.97	816.6	2.7	23.6	0.24	2.66	99.4	2.75	1.74	1.44	4.3	10.12	20.75	2.33	7.67	1.7	0.51	1.16	0.18	0.84	0.17	0.42	0.45	0.07	85.3	52.2	0.75	17.99
EMPA	CA30	La Copa Rhyolite	4.9-3.9 Ma	381726	6332690	70.78	0.21	16.72	1.41	0.04	0.44	2.35	2.71	5.27	0.07	2.17	3.07	2.46	1.84	108	788	39.97	816.6	2.7	23.6	0.24	2.66	99.4	2.75	1.74	1.44	4.3	10.12	20.75	2.33	7.67	1.7	0.51	1.16	0.18	0.84	0.17	0.42	0.45	0.07	85.3	52.2	0.75	17.99
EMPA	CA30	La Copa Rhyolite	4.9-3.9 Ma	381726	6332690	70.78	0.21	16.72	1.41	0.04	0.44	2.35	2.71	5.27	0.07	2.17	3.07	2.46	1.84	108	788	39.97	816.6	2.7	23.6	0.24	2.66	99.4	2.75	1.74	1.44	4.3	10.12	20.75	2.33	7.67	1.7	0.51	1.16	0.18	0.84	0.17	0.42	0.45	0.07	85.3	52.2	0.75	17.99
EMPA	CA30	La Copa Rhyolite	4.9-3.9 Ma	381726	6332690	70.78	0.21	16.72	1.41	0.04	0.44	2.35	2.71	5.27	0.07	2.17	3.07	2.46	1.84	108	788	39.97	816.6	2.7	23.6	0.24	2.66	99.4	2.75	1.74	1.44	4.3	10.12	20.75	2.33	7.67	1.7	0.51	1.16	0.18	0.84	0.17	0.42	0.45	0.07	85.3	52.2	0.75	17.99
LACOPATHINSECTION_03_01	CA30	La Copa Rhyolite	4.9-3.9 Ma	381726	6332690	70.78	0.21	16.72	1.41	0.04	0.44	2.35	2.71	5.27	0.07	2.17	3.07	2.46	1.84	108	788	39.97	816.6	2.7	23.6	0.24	2.66	99.4	2.75	1.74	1.44	4.3	10.12	20.75	2.33	7.67	1.7	0.51	1.16	0.18	0.84	0.17	0.42	0.45	0.07	85.3	52.2	0.75	17.99
LACOPATHINSECTION_05_01	CA30	La Copa Rhyolite	4.9-3.9 Ma	381726	6332690	70.78	0.21	16.72	1.41	0.04	0.44	2.35	2.71	5.27	0.07	2.17	3.07	2.46	1.84	108	788	39.97	816.6	2.7	23.6	0.24	2.66	99.4	2.75	1.74	1.44	4.3	10.12	20.75	2.33	7.67	1.7	0.51	1.16	0.18	0.84	0.17	0.42	0.45	0.07	85.3	52.2	0.75	17.99
LACOPATHINSECTION_05_03	CA30	La Copa Rhyolite	4.9-3.9 Ma	381726	6332690	70.78	0.21	16.72	1.41	0.04	0.44	2.35	2.71	5.27	0.07	2.17	3.07	2.46	1.84	108	788	39.97	816.6	2.7	23.6	0.24	2.66	99.4	2.75	1.74	1.44	4.3	10.12	20.75	2.33	7.67	1.7	0.51	1.16	0.18	0.84	0.17	0.42	0.45	0.07	85.3	52.2	0.75	17.99
LACOPATHINSECTION_08_01	CA30	La Copa Rhyolite	4.9-3.9 Ma	381726	6332690	70.78	0.21	16.72	1.41	0.04	0.44	2.35	2.71	5.27	0.07	2.17	3.07	2.46	1.84	108	788	39.97	816.6	2.7	23.6	0.24	2.66	99.4	2.75	1.74	1.44	4.3	10.12	20.75	2.33	7.67	1.7	0.51	1.16	0.18	0.84	0.17	0.42	0.45	0.07	85.3	52.2	0.75	17.99
LACOPATHINSECTION_08_02	CA30	La Copa Rhyolite	4.9-3.9 Ma	381726	6332690	70.78	0.21	16.72	1.41	0.04	0.44	2.35	2.71	5.27	0.07	2.17	3.07	2.46	1.84	108	788	39.97	816.6	2.7	23.6	0.24	2.66	99.4	2.75	1.74	1.44	4.3	10.12	20.75	2.33	7.67	1.7	0.51	1.16	0.18	0.84	0.17	0.42	0.45	0.07	85.3	52.2	0.75	17.99
LACOPATHINSECTION_13_01	CA30	La Copa Rhyolite	4.9-3.9 Ma	381726	6332690	70.78	0.21	16.72	1.41	0.04	0.44	2.35	2.71	5.27	0.07	2.17	3.07	2.46	1.84	108	788	39.97	816.6	2.7	23.6	0.24	2.66	99.4	2.75	1.74	1.44	4.3	10.12	20.75	2.33	7.67	1.7	0.51	1.16	0.18	0.84	0.17	0.42	0.45	0.07	85.3	52.2	0.75	17.99
EMPA	CA30	La Copa Rhyolite	4.9-3.9 Ma	381726	6332690	70.78	0.21	16.72	1.41	0.04	0.44	2.35	2.71	5.27	0.07	2.17	3.07	2.46	1.84	108	788	39.97	816.6	2.7	23.6	0.24	2.66	99.4	2.75	1.74	1.44	4.3	10.12	20.75	2.33	7.67	1.7	0.51	1.16	0.18	0.84	0.17	0.42	0.45	0.07	85.3	52.2	0.75	17.99
EMPA	CA30	La Copa Rhyolite	4.9-3.9 Ma	381726	6332690	70.78	0.21	16.72	1.41	0.04	0.44	2.35	2.71	5.27	0.07	2.17	3.07	2.46	1.84	108	788	39.97	816.6	2.7	23.6	0.24	2.66	99.4	2.75	1.74	1.44	4.3	10.12	20.75	2.33	7.67	1.7	0.51	1.16	0.18	0.84	0.17	0.42	0.45	0.07	85.3	52.2	0.75	17.99
EMPA	CA30	La Copa Rhyolite	4.9-3.9 Ma	381726	6332690	70.78	0.21	16.72	1.41	0.04	0.44	2.35	2.71	5.27	0.07	2.17	3.07	2.46	1.84	108	788	39.97	816.6	2.7	23.6	0.24	2.66	99.4	2.75	1.74	1.44	4.3	10.12	20.75	2.33	7.67	1.7	0.51	1.16	0.18	0.84	0.17	0.42	0.45	0.07	85.3	52.2	0.75	17.99
EMPA	CA30	La Copa Rhyolite	4.9-3.9 Ma	381726	6332690	70.78	0.21	16.72	1.41	0.04	0.44	2.35	2.71	5.27	0.07	2.17	3.07	2.46	1.84	108	788	39.97	816.6	2.7	23.6	0.24	2.66	99.4	2.75	1.74	1.44	4.3	10.12	20.75	2.33	7.67	1.7	0.51	1.16	0.18	0.84	0.17	0.42	0.45	0.07	85.3	52.2	0.75	17.99
EMPA	CA30	La Copa Rhyolite	4.9-3.9 Ma	381726	6332690	70.78	0.21	16.72	1.41	0.04	0.44	2.35	2.71	5.27	0.07	2.17	3.07	2.46	1.84	108	788	39.97	816.6	2.7	23.6	0.24	2.66	99.4	2.75	1.74	1.44	4.3	10.12	20.75	2.33	7.67	1.7	0.51	1.16	0.18	0.84	0.17	0.42	0.45	0.07	85.3	52.2	0.75	17.99
EMPA	CA30	La Copa Rhyolite	4.9-3.9 Ma	381726	6332690	70.78	0.21	16.72	1.41	0.04	0.44	2.35	2.71	5.27	0.07	2.17	3.07	2.46	1.84	108	788	39.97	816.6	2.7	23.6	0.24	2.66	99.4	2.75	1.74	1.44	4.3	10.12	20.75	2.33	7.67	1.7	0.51	1.16	0.18	0.84	0.17	0.42	0.45	0.07	85.3	52.2	0.75	17.99
EMPA	CA30	La Copa Rhyolite	4.9-3.9 Ma	381726	6332690	70.78	0.21	16.72	1.41	0.04	0.44	2.35	2.71	5.27	0.07	2.17	3.07	2.46	1.84	108	788	39.97	816.6	2.7	23.6	0.24	2.66	99.4	2.75	1.74	1.44	4.3	10.12	20.75	2.33	7.67	1.7	0.51	1.16	0.18	0.84	0.17	0.42	0.45	0.07	85.3	52.2	0.75	17.99
EMPA	CA30	La Copa Rhyolite	4.9-3.9 Ma	381726	6332690	70.78	0.21	16.72	1.41	0.04	0.44	2.35	2.71	5.27	0.07	2.17	3.07	2.46	1.84	108	788	39.97	816.6	2.7	23.6	0.24	2.66	99.4	2.75	1.74	1.44	4.3	10.12	20.75	2.33	7.67	1.7	0.51	1.16	0.18	0.84	0.17	0.42	0.45	0.07	85.3	52.2	0.75	17.99
EMPA	CA30	La Copa Rhyolite	4.9-3.9 Ma	381726	6332690	70.78	0.21	16.72	1.41	0.04	0.44	2.35	2.71	5.27	0.07	2.17	3.07	2.46	1.84	108	788	39.97	816.6	2.7	23.6	0.24	2.66	99.4	2.75	1.74	1.44	4.3	10.12	20.75	2.33	7.67	1.7	0.51	1.16	0.18	0.84	0.17	0.42	0.45	0.07	85.3	52.2	0.75	17.99
EMPA	CA30	La Copa Rhyolite	4.9-3.9 Ma	381726	6332690	70.78	0.21	16.72	1.41	0.04	0.44	2.35	2.71	5.27	0.07	2.17	3.07	2.46	1.84	108	788	39.97	816.6	2.7	23.6	0.24	2.66	99.4	2.75	1.74	1.44	4.3	10.12	20.75	2.33	7.67	1.7	0.51	1.16	0.18	0.84	0.17	0.42	0.45	0.07	85.3	52.2	0.75	17.99
EMPA	CA30	La Copa Rhyolite	4.9-3.9 Ma	381726	6332690	70.78	0.21	16.72	1.41	0.04	0.44	2.35	2.71	5.27	0.07	2.17	3.07	2.46	1.84	108	788	39.97	816.6	2.7	23.6	0.24	2.66	99.4	2.75	1.74	1.44	4.3	10.12	20.75	2.33	7.67	1.7	0.51	1.16	0.18	0.84	0.17	0.42	0.45	0.07	85.3	52.2	0.75	17.99
EMPA	CA30	La Copa Rhyolite	4.9-3.9 Ma	381726	6332690	70.78	0.21	16.72	1.41	0.04	0.44	2.35	2.71	5.27	0.07	2.17	3.07	2.46	1.84	108	788	39.97	816.6	2.7	23.6	0.24	2.66	99.4	2.75	1.74	1.44	4.3	10.12	20.75	2.33	7.67	1.7	0.51	1.16	0.18	0.84	0.17	0.42	0.45	0.07	85.3	52.2	0.75	17.99
EMPA	CA30	La Copa Rhyolite	4.9-3.9 Ma	381726	6332690	70.78	0.21	16.72	1.41	0.04	0.44	2.35	2.71	5.27	0.07	2.17	3.07	2.46	1.84	108	788	39.97	816.6	2.7	23.6	0.24	2.66	99.4	2.75	1.74	1.44	4.3	10.12	20.75	2.33	7.67	1.7	0.51	1.16	0.18	0.84	0.17	0.42	0.45	0.07	85.3	52.2	0.75	17.99
EMPA	CA30	La Copa Rhyolite	4.9-3.9 Ma	381726	6332690	70.78	0.21	16.72	1.41	0.04	0.44	2.35	2.71	5.27	0.07	2.17	3.07	2.46	1.84	108	788	39.97	816.6	2.7	23.6	0.24	2.66	99.4	2.75	1.74	1.44	4.3	10.12	20.75	2.33	7.67	1.7	0.51	1.16	0.18	0.84	0.17	0.42	0.45	0.07	85.3	52.2	0.75	17.99
EMPA	CA30	La Copa Rhyolite	4.9-3.9 Ma	381726	6332690	70.78	0.21	16.72	1.41	0.04	0.44	2.35	2.71	5.27	0.07	2.17	3.07	2.46	1.84	108	788	39.97	816.6	2.7	23.6	0.24	2.66	99.4	2.75	1.74	1.44	4.3	10.12	20.75	2.33	7.67	1.7	0.51	1.16	0.18	0.84	0.17	0.42	0.45	0.07	85.3	52.2	0.75	17.99
EMPA	CA30	La Copa Rhyolite	4.9-3.9 Ma	381726	6332690	70.78	0.21	16.72	1.41	0.04	0.44	2.35	2.71	5.27	0.07	2.17	3.07	2.46	1.84	108	788	39.97	816.6	2.7	23.6	0.24	2.66	99.4	2.75	1.74	1.44	4.3	10.12	20.75	2.33	7.67	1.7	0.51	1.16	0.18	0.84	0.17	0.42	0.45	0.07	85.3	52.2	0.75	17.99
EMPA	CA30	La Copa Rhyolite	4.9-3.9 Ma	381726	6332690	70.78	0.21	16.72	1.41	0.04	0.44	2.35	2.71	5.27	0.07	2.17	3.07	2.46	1.84	108	788	39.97	816.6	2.7	23.6	0.24	2.66	99.4	2.75	1.74	1.44	4.3	10.12	20.75	2.33	7.67	1.7	0.51	1.16	0.18	0.84	0.17	0.42	0.45	0.07	85.3	52.2	0.75	17.99
EMPA	CA30	La Copa Rhyolite	4.9-3.9 Ma	381726	6332690	70.78	0.21	16.72	1.41	0.04	0.44	2.35	2.71	5.27	0.07	2.17	3.07	2.46	1.84	108	788	39.97	816.6	2.7	23.6	0.24	2.66	99.4	2.75	1.74	1.44	4.3	10.12	20.75	2.33	7.67	1.7	0.51	1.16	0.18	0.84	0.17	0.42	0.45	0.07	85.3	52.2	0.75	17.99
EMPA	CA30	La Copa Rhyolite	4.9-3.9 Ma	381726	6332690	70.78	0.21	16.72	1.41	0.04	0.44	2.35	2.71	5.27	0.07	2.17	3.07	2.46	1.84	108	788	39.97	816.6	2.7	23.6	0.24	2.66	99.4	2.75	1.74	1.44	4.3	10.12	20.75	2.33	7.67	1.7	0.51	1.16	0.18	0.84	0.17	0.42	0.45	0.07	85.3	52.2	0.75	17.99
EMPA	CA30	La Copa Rhyolite	4.9-3.9 Ma	381726	6332690	70.78	0.21	16.72	1.41	0.04	0.44	2.35	2.71	5.27	0.07	2.17	3.07	2.46	1.84	108	788	39.97	816.6	2.7	23.6	0.24	2.66	99.4	2.75	1.74	1.44	4.3	10.12	20.75	2.33	7.67	1.7	0.51	1.16	0.18	0.84	0.17	0.42	0.45	0.07	85.3	52.2	0.75	17.99
EMPA	CA30	La Copa Rhyolite	4.9-3.9 Ma	381726	6332690	70.78	0.21	16.72	1.41	0.04	0.44	2.35	2.71	5.27	0.07	2.17	3.07	2.46	1.84	108	788	39.97	816.6	2.7	23.6	0.24	2.66	99.4	2.75	1.74	1.44	4.3	10.12	20.75	2.33	7.67	1.7	0.51	1.16	0.18	0.84	0.17	0.42	0.45	0.07	85.3	52.2	0.75	17.99
CN11_ABA_07_01	CN11	Los Pelambres	23.1-16.8 Ma	366092	6406269	56.96	0.91	18.94	7.66	0.12	3.88	5.19	1.55	4.57	0.2	3.5	42.39	18.66	20.52	26	369	0.51	672.2	22.8	176.7	0.49	6.43	221.1	6.27	10.56	3	26.5	18.65	43.22	5.89	23.94	5.47	1.23	5.17	0.79	4.58	0.93	2.69	2.49	0.38	75.4	60.1	0.98	9.85
CN11_ABA_09_02	CN11	Los Pelambres	23.1-16.8 Ma	366092	6406269	56.96	0.91	18.94	7.66	0.12	3.88	5.19	1.55	4.57	0.2	3.5	42.39	18.66	20.52	26	369	0.51	672.2	22.8	176.7	0.49	6.43	221.1	6.27	10.56	3	26.5	18.65	43.22	5.89	23.94	5.47	1.23	5.17	0.79	4.58	0.93	2.69	2.49	0.38	75.4	60.1	0.98	9.85
CN11_ABA_09_03	CN11	Los Pelambres	23.1-16.8 Ma	366092	6406269	56.96	0.91	18.94	7.66	0.12	3.88	5.19	1.55	4.57	0.2	3.5	42.39	18.66	20.52	26	369	0.51	672.2	22.8	176.7	0.49	6.43	221.1	6.27	10.56	3	26.5	18.65	43.22	5.89	23.94	5.47	1.23	5.17	0.79	4.58	0.93	2.69	2.49	0.38	75.4	60.1	0.98	9.85
CN11_ABA_09_04	CN11	Los Pelambres	23.1-16.8 Ma	366092	6406269	56.96	0.91	18.94	7.66	0.12	3.88	5.19	1.55	4.57	0.2	3.5	42.39	18.66	20.52	26	369	0.51	672.2	22.8	176.7	0.49	6.43	221.1	6.27	10.56	3	26.5	18.65	43.22	5.89	23.94	5.47	1.23	5.17	0.79	4.58	0.93	2.69	2.49	0.38	75.4	60.1	0.98	9.85
CN11_ABA_12_01	CN11	Los Pelambres	23.1-16.8 Ma	366092	6406269	56.96	0.91	18.94	7.66	0.12	3.88	5.19	1.55	4.57	0.2	3.5	42.39	18.66	20.52	26	369	0.51	672.2	22.8	176.7	0.49	6.43	221.1	6.27	10.56	3	26.5	18.65	43.22	5.89	23.94	5.47	1.23	5.17	0.79	4.58	0.93	2.69	2.49	0.38	75.4	60.1	0.98	9.85
CN11_ABA_14_02	CN11	Los Pelambres	23.1-16.8 Ma	366092	6406269	56.96	0.91	18.94	7.66	0.12	3.88	5.19	1.55	4.57	0.2	3.5	42.39	18.66	20.52	26	369	0.51	672.2	22.8	176.7	0.49	6.43	221.1	6.27	10.56	3	26.5	18.65	43.22	5.89	23.94	5.47	1.23	5.17	0.79	4.58	0.93	2.69	2.49	0.38	75.4	60.1	0.98	9.85
EMPA	CN11	Los Pelambres	23.1-16.8 Ma	366092	6406269	56.96	0.91	18.94	7.66	0.12	3.88	5.19	1.55	4.57	0.2	3.5	42.39	18.66	20.52	26	369	0.51	672.2	22.8	176.7	0.49	6.43	221.1	6.27	10.56	3	26.5	18.65	43.22	5.89	23.94	5.47	1.23	5.17	0.79	4.58	0.93	2.69	2.49	0.38	75.4	60.1	0.98	9.85
EMPA	CN11	Los Pelambres	23.1-16.8 Ma	366092	6406269	56.96	0.91	18.94	7.66	0.12	3.88	5.19	1.55	4.57	0.2	3.5	42.39	18.66	20.52	26	369	0.51	672.2	22.8	176.7	0.49	6.43	221.1	6.27	10.56	3	26.5	18.65	43.22	5.89	23.94	5.47	1.23	5.17	0.79	4.58	0.93	2.69	2.49	0.38	75.4	60.1	0.98	9.85
EMPA	CN11	Los Pelambres	23.1-16.8 Ma	366092	6406269	56.96	0.91	18.94	7.66	0.12	3.88	5.19	1.55	4.57	0.2	3.5	42.39	18.66	20.52	26	369	0.51	672.2	22.8	176.7	0.49	6.43	221.1	6.27	10.56	3	26.5	18.65	43.22	5.89	23.94	5.47	1.23	5.17	0.79	4.58	0.93	2.69	2.49	0.38	75.4	60.1	0.98	9.85
EMPA	CN11	Los Pelambres	23.1-16.8 Ma	366092	6406269	56.96	0.91	18.94	7.66	0.12	3.88	5.19	1.55	4.57	0.2	3.5	42.39	18.66	20.52	26	369	0.51	672.2	22.8	176.7	0.49	6.43	221.1	6.27	10.56	3	26.5	18.65	43.22	5.89	23.94	5.47	1.23	5.17	0.79	4.58	0.93	2.69	2.49	0.38	75.4	60.1	0.98	9.85
EMPA	CN11	Los Pelambres	23.1-16.8 Ma	366092	6406269	56.96	0.91	18.94	7.66	0.12	3.88	5.19	1.55	4.57	0.2	3.5	42.39	18.66	20.52	26	369	0.51	672.2	22.8	176.7	0.49	6.43	221.1	6.27	10.56	3	26.5	18.65	43.22	5.89	23.94	5.47	1.23	5.17	0.79	4.58	0.93	2.69	2.49	0.38	75.4	60.1	0.98	9.85
EMPA	CN11	Los Pelambres	23.1-16.8 Ma	366092	6406269	56.96	0.91	18.94	7.66	0.12	3.88	5.19	1.55	4.57	0.2	3.5	42.39	18.66	20.52	26	369	0.51	672.2	22.8	176.7	0.49	6.43	221.1	6.27	10.56	3	26.5	18.65	43.22	5.89	23.94	5.47	1.23	5.17	0.79	4.58	0.93	2.69	2.49	0.38	75.4	60.1	0.98	9.85
EMPA	CN11	Los Pelambres	23.1-16.8 Ma	366092	6406269	56.96	0.91	18.94	7.66	0.12	3.88	5.19	1.55	4.57	0.2	3.5	42.39	18.66	20.52	26	369	0.51	672.2	22.8	176.7	0.49	6.43	221.1	6.27	10.56	3	26.5	18.65	43.22	5.89	23.94	5.47	1.23	5.17	0.79	4.58	0.93	2.69	2.49	0.38	75.4	60.1	0.98	9.85
EMPA	CN11	Los Pelambres	23.1-16.8 Ma	366092	6406269	56.96	0.91	18.94	7.66	0.12	3.88	5.19	1.55	4.57	0.2	3.5	42.39	18.66	20.52	26	369	0.51	672.2	22.8	176.7	0.49	6.43	221.1	6.27	10.56	3	26.5	18.65	43.22	5.89	23.94	5.47	1.23	5.17	0.79	4.58	0.93	2.69	2.49	0.38	75.4	60.1	0.98	9.85
EMPA	CN11	Los Pelambres	23.1-16.8 Ma	366092	6406269	56.96	0.91	18.94	7.66	0.12	3.88	5.19	1.55	4.57	0.2	3.5	42.39	18.66	20.52	26	369	0.51	672.2	22.8	176.7	0.49	6.43	221.1	6.27	10.56	3	26.5	18.65	43.22	5.89	23.94	5.47	1.23	5.17	0.79	4.58	0.93	2.69	2.49	0.38	75.4	60.1	0.98	9.85
EMPA	CN11	Los Pelambres	23.1-16.8 Ma	366092	6406269	56.96	0.91	18.94	7.66	0.12	3.88	5.19	1.55	4.57	0.2	3.5	42.39	18.66	20.52	26	369	0.51	672.2	22.8	176.7	0.49	6.43	221.1	6.27	10.56	3	26.5	18.65	43.22	5.89	23.94	5.47	1.23	5.17	0.79	4.58	0.93	2.69	2.49	0.38	75.4	60.1	0.98	9.85
EMPA	CN11	Los Pelambres	23.1-16.8 Ma	366092	6406269	56.96	0.91	18.94	7.66	0.12	3.88	5.19	1.55	4.57	0.2	3.5	42.39	18.66	20.52	26	369	0.51	672.2	22.8	176.7	0.49	6.43	221.1	6.27	10.56	3	26.5	18.65	43.22	5.89	23.94	5.47	1.23	5.17	0.79	4.58	0.93	2.69	2.49	0.38	75.4	60.1	0.98	9.85
EMPA	CN11	Los Pelambres	23.1-16.8 Ma	366092	6406269	56.96	0.91	18.94	7.66	0.12	3.88	5.19	1.55	4.57	0.2	3.5	42.39	18.66	20.52	26	369	0.51	672.2	22.8	176.7	0.49	6.43	221.1	6.27	10.56	3	26.5	18.65	43.22	5.89	23.94	5.47	1.23	5.17	0.79	4.58	0.93	2.69	2.49	0.38	75.4	60.1	0.98	9.85
EMPA	CN11	Los Pelambres	23.1-16.8 Ma	366092	6406269	56.96	0.91	18.94	7.66	0.12	3.88	5.19	1.55	4.57	0.2	3.5	42.39	18.66	20.52	26	369	0.51	672.2	22.8	176.7	0.49	6.43	221.1	6.27	10.56	3	26.5	18.65	43.22	5.89	23.94	5.47	1.23	5.17	0.79	4.58	0.93	2.69	2.49	0.38	75.4	60.1	0.98	9.85
EMPA	CN11	Los Pelambres	23.1-16.8 Ma	366092	6406269	56.96	0.91	18.94	7.66	0.12	3.88	5.19	1.55	4.57	0.2	3.5	42.39	18.66	20.52	26	369	0.51	672.2	22.8	176.7	0.49	6.43	221.1	6.27	10.56	3	26.5	18.65	43.22	5.89	23.94	5.47	1.23	5.17	0.79	4.58	0.93	2.69	2.49	0.38	75.4	60.1	0.98	9.85
EMPA	CN11	Los Pelambres	23.1-16.8 Ma	366092	6406269	56.96	0.91	18.94	7.66	0.12	3.88	5.19	1.55	4.57	0.2	3.5	42.39	18.66	20.52	26	369	0.51	672.2	22.8	176.7	0.49	6.43	221.1	6.27	10.56	3	26.5	18.65	43.22	5.89	23.94	5.47	1.23	5.17	0.79	4.58	0.93	2.69	2.49	0.38	75.4	60.1	0.98	9.85
EMPA	CN11	Los Pelambres	23.1-16.8 Ma	366092	6406269	56.96	0.91	18.94	7.66	0.12	3.88	5.19	1.55	4.57	0.2	3.5	42.39	18.66	20.52	26	369	0.51	672.2	22.8	176.7	0.49	6.43	221.1	6.27	10.56	3	26.5	18.65	43.22	5.89	23.94	5.47	1.23	5.17	0.79	4.58	0.93	2.69	2.49	0.38	75.4	60.1	0.98	9.85
EMPA	CN11	Los Pelambres	23.1-16.8 Ma	366092	6406269	56.96	0.91	18.94	7.66	0.12	3.88	5.19	1.55	4.57	0.2	3.5	42.39	18.66	20.52	26	369	0.51	672.2	22.8	176.7	0.49	6.43	221.1	6.27	10.56	3	26.5	18.65	43.22	5.89	23.94	5.47	1.23	5.17	0.79	4.58	0.93	2.69	2.49	0.38	75.4	60.1	0.98	9.85
EMPA	CN11	Los Pelambres	23.1-16.8 Ma	366092	6406269	56.96	0.91	18.94	7.66	0.12	3.88	5.19	1.55	4.57	0.2	3.5	42.39	18.66	20.52	26	369	0.51	672.2	22.8	176.7	0.49	6.43	221.1	6.27	10.56	3	26.5	18.65	43.22	5.89	23.94	5.47	1.23	5.17	0.79	4.58	0.93	2.69	2.49	0.38	75.4	60.1	0.98	9.85
EMPA	CN11	Los Pelambres	23.1-16.8 Ma	366092	6406269	56.96	0.91	18.94	7.66	0.12	3.88	5.19	1.55	4.57	0.2	3.5	42.39	18.66	20.52	26	369	0.51	672.2	22.8	176.7	0.49	6.43	221.1	6.27	10.56	3	26.5	18.65	43.22	5.89	23.94	5.47	1.23	5.17	0.79	4.58	0.93	2.69	2.49	0.38	75.4	60.1	0.98	9.85
EMPA	CN11	Los Pelambres	23.1-16.8 Ma	366092	6406269	56.96	0.91	18.94	7.66	0.12	3.88	5.19	1.55	4.57	0.2	3.5	42.39	18.66	20.52	26	369	0.51	672.2	22.8	176.7	0.49	6.43	221.1	6.27	10.56	3	26.5	18.65	43.22	5.89	23.94	5.47	1.23	5.17	0.79	4.58	0.93	2.69	2.49	0.38	75.4	60.1	0.98	9.85
EMPA	CN11	Los Pelambres	23.1-16.8 Ma	366092	6406269	56.96	0.91	18.94	7.66	0.12	3.88	5.19	1.55	4.57	0.2	3.5	42.39	18.66	20.52	26	369	0.51	672.2	22.8	176.7	0.49	6.43	221.1	6.27	10.56	3	26.5	18.65	43.22	5.89	23.94	5.47	1.23	5.17	0.79	4.58	0.93	2.69	2.49	0.38	75.4	60.1	0.98	9.85
EMPA	CN11	Los Pelambres	23.1-16.8 Ma	366092	6406269	56.96	0.91	18.94	7.66	0.12	3.88	5.19	1.55	4.57	0.2	3.5	42.39	18.66	20.52	26	369	0.51	672.2	22.8	176.7	0.49	6.43	221.1	6.27	10.56	3	26.5	18.65	43.22	5.89	23.94	5.47	1.23	5.17	0.79	4.58	0.93	2.69	2.49	0.38	75.4	60.1	0.98	9.85
EMPA	CN11	Los Pelambres	23.1-16.8 Ma	366092	6406269	56.96	0.91	18.94	7.66	0.12	3.88	5.19	1.55	4.57	0.2	3.5	42.39	18.66	20.52	26	369	0.51	672.2	22.8	176.7	0.49	6.43	221.1	6.27	10.56	3	26.5	18.65	43.22	5.89	23.94	5.47	1.23	5.17	0.79	4.58	0.93	2.69	2.49	0.38	75.4	60.1	0.98	9.85
EMPA	CN11	Los Pelambres	23.1-16.8 Ma	366092	6406269	56.96	0.91	18.94	7.66	0.12	3.88	5.19	1.55	4.57	0.2	3.5	42.39	18.66	20.52	26	369	0.51	672.2	22.8	176.7	0.49	6.43	221.1	6.27	10.56	3	26.5	18.65	43.22	5.89	23.94	5.47	1.23	5.17	0.79	4.58	0.93	2.69	2.49	0.38	75.4	60.1	0.98	9.85
EMPA	CN11	Los Pelambres	23.1-16.8 Ma	366092	6406269	56.96	0.91	18.94	7.66	0.12	3.88	5.19	1.55	4.57	0.2	3.5	42.39	18.66	20.52	26	369	0.51	672.2	22.8	176.7	0.49	6.43	221.1	6.27	10.56	3	26.5	18.65	43.22	5.89	23.94	5.47	1.23	5.17	0.79	4.58	0.93	2.69	2.49	0.38	75.4	60.1	0.98	9.85
CN37-ABA_06_01	CN37	Los Pelambres	21.9 Ma	355172	6380382	63.18	0.6	18.69	4.37	0.05	1.6	4.88	1.45	4.98	0.2	3.63	9.34	11.06	7.06	23	819	4.13	624.6	7.1	93.8	0.17	1.76	75.4	2.19	0.74	0.19	5.3	9.44	25.94	3.18	14.22	2.61	0.84	1.94	0.26	1.22	0.22	0.56	0.5	0.08	52.5	65.8	0.51	4.77
CN37-ABA_07_01	CN37	Los Pelambres	21.9 Ma	355172	6380382	63.18	0.6	18.69	4.37	0.05	1.6	4.88	1.45	4.98	0.2	3.63	9.34	11.06	7.06	23	819	4.13	624.6	7.1	93.8	0.17	1.76	75.4	2.19	0.74	0.19	5.3	9.44	25.94	3.18	14.22	2.61	0.84	1.94	0.26	1.22	0.22	0.56	0.5	0.08	52.5	65.8	0.51	4.77
CN37-ABA_07_02	CN37	Los Pelambres	21.9 Ma	355172	6380382	63.18	0.6	18.69	4.37	0.05	1.6	4.88	1.45	4.98	0.2	3.63	9.34	11.06	7.06	23	819	4.13	624.6	7.1	93.8	0.17	1.76	75.4	2.19	0.74	0.19	5.3	9.44	25.94	3.18	14.22	2.61	0.84	1.94	0.26	1.22	0.22	0.56	0.5	0.08	52.5	65.8	0.51	4.77
CN37-ABA_08_01	CN37	Los Pelambres	21.9 Ma	355172	6380382	63.18	0.6	18.69	4.37	0.05	1.6	4.88	1.45	4.98	0.2	3.63	9.34	11.06	7.06	23	819	4.13	624.6	7.1	93.8	0.17	1.76	75.4	2.19	0.74	0.19	5.3	9.44	25.94	3.18	14.22	2.61	0.84	1.94	0.26	1.22	0.22	0.56	0.5	0.08	52.5	65.8	0.51	4.77
CN37-ABA_09_03	CN37	Los Pelambres	21.9 Ma	355172	6380382	63.18	0.6	18.69	4.37	0.05	1.6	4.88	1.45	4.98	0.2	3.63	9.34	11.06	7.06	23	819	4.13	624.6	7.1	93.8	0.17	1.76	75.4	2.19	0.74	0.19	5.3	9.44	25.94	3.18	14.22	2.61	0.84	1.94	0.26	1.22	0.22	0.56	0.5	0.08	52.5	65.8	0.51	4.77
CN37-ABA_11_01	CN37	Los Pelambres	21.9 Ma	355172	6380382	63.18	0.6	18.69	4.37	0.05	1.6	4.88	1.45	4.98	0.2	3.63	9.34	11.06	7.06	23	819	4.13	624.6	7.1	93.8	0.17	1.76	75.4	2.19	0.74	0.19	5.3	9.44	25.94	3.18	14.22	2.61	0.84	1.94	0.26	1.22	0.22	0.56	0.5	0.08	52.5	65.8	0.51	4.77
CN37-ABA_12_03	CN37	Los Pelambres	21.9 Ma	355172	6380382	63.18	0.6	18.69	4.37	0.05	1.6	4.88	1.45	4.98	0.2	3.63	9.34	11.06	7.06	23	819	4.13	624.6	7.1	93.8	0.17	1.76	75.4	2.19	0.74	0.19	5.3	9.44	25.94	3.18	14.22	2.61	0.84	1.94	0.26	1.22	0.22	0.56	0.5	0.08	52.5	65.8	0.51	4.77
CN37-ABA_13_01	CN37	Los Pelambres	21.9 Ma	355172	6380382	63.18	0.6	18.69	4.37	0.05	1.6	4.88	1.45	4.98	0.2	3.63	9.34	11.06	7.06	23	819	4.13	624.6	7.1	93.8	0.17	1.76	75.4	2.19	0.74	0.19	5.3	9.44	25.94	3.18	14.22	2.61	0.84	1.94	0.26	1.22	0.22	0.56	0.5	0.08	52.5	65.8	0.51	4.77
CN37-ABA_14_01	CN37	Los Pelambres	21.9 Ma	355172	6380382	63.18	0.6	18.69	4.37	0.05	1.6	4.88	1.45	4.98	0.2	3.63	9.34	11.06	7.06	23	819	4.13	624.6	7.1	93.8	0.17	1.76	75.4	2.19	0.74	0.19	5.3	9.44	25.94	3.18	14.22	2.61	0.84	1.94	0.26	1.22	0.22	0.56	0.5	0.08	52.5	65.8	0.51	4.77
CN37-ABA_16_01	CN37	Los Pelambres	21.9 Ma	355172	6380382	63.18	0.6	18.69	4.37	0.05	1.6	4.88	1.45	4.98	0.2	3.63	9.34	11.06	7.06	23	819	4.13	624.6	7.1	93.8	0.17	1.76	75.4	2.19	0.74	0.19	5.3	9.44	25.94	3.18	14.22	2.61	0.84	1.94	0.26	1.22	0.22	0.56	0.5	0.08	52.5	65.8	0.51	4.77
CN37-ABA_19_01	CN37	Los Pelambres	21.9 Ma	355172	6380382	63.18	0.6	18.69	4.37	0.05	1.6	4.88	1.45	4.98	0.2	3.63	9.34	11.06	7.06	23	819	4.13	624.6	7.1	93.8	0.17	1.76	75.4	2.19	0.74	0.19	5.3	9.44	25.94	3.18	14.22	2.61	0.84	1.94	0.26	1.22	0.22	0.56	0.5	0.08	52.5	65.8	0.51	4.77
CN37-ABA_19_02	CN37	Los Pelambres	21.9 Ma	355172	6380382	63.18	0.6	18.69	4.37	0.05	1.6	4.88	1.45	4.98	0.2	3.63	9.34	11.06	7.06	23	819	4.13	624.6	7.1	93.8	0.17	1.76	75.4	2.19	0.74	0.19	5.3	9.44	25.94	3.18	14.22	2.61	0.84	1.94	0.26	1.22	0.22	0.56	0.5	0.08	52.5	65.8	0.51	4.77
CN37-ABA_19_03	CN37	Los Pelambres	21.9 Ma	355172	6380382	63.18	0.6	18.69	4.37	0.05	1.6	4.88	1.45	4.98	0.2	3.63	9.34	11.06	7.06	23	819	4.13	624.6	7.1	93.8	0.17	1.76	75.4	2.19	0.74	0.19	5.3	9.44	25.94	3.18	14.22	2.61	0.84	1.94	0.26	1.22	0.22	0.56	0.5	0.08	52.5	65.8	0.51	4.77
CN37-ABA_19_07	CN37	Los Pelambres	21.9 Ma	355172	6380382	63.18	0.6	18.69	4.37	0.05	1.6	4.88	1.45	4.98	0.2	3.63	9.34	11.06	7.06	23	819	4.13	624.6	7.1	93.8	0.17	1.76	75.4	2.19	0.74	0.19	5.3	9.44	25.94	3.18	14.22	2.61	0.84	1.94	0.26	1.22	0.22	0.56	0.5	0.08	52.5	65.8	0.51	4.77
CN37-ABA_19_08	CN37	Los Pelambres	21.9 Ma	355172	6380382	63.18	0.6	18.69	4.37	0.05	1.6	4.88	1.45	4.98	0.2	3.63	9.34	11.06	7.06	23	819	4.13	624.6	7.1	93.8	0.17	1.76	75.4	2.19	0.74	0.19	5.3	9.44	25.94	3.18	14.22	2.61	0.84	1.94	0.26	1.22	0.22	0.56	0.5	0.08	52.5	65.8	0.51	4.77
CN37-ABA_20_01	CN37	Los Pelambres	21.9 Ma	355172	6380382	63.18	0.6	18.69	4.37	0.05	1.6	4.88	1.45	4.98	0.2	3.63	9.34	11.06	7.06	23	819	4.13	624.6	7.1	93.8	0.17	1.76	75.4	2.19	0.74	0.19	5.3	9.44	25.94	3.18	14.22	2.61	0.84	1.94	0.26	1.22	0.22	0.56	0.5	0.08	52.5	65.8	0.51	4.77
CN37-ABA_20_02	CN37	Los Pelambres	21.9 Ma	355172	6380382	63.18	0.6	18.69	4.37	0.05	1.6	4.88	1.45	4.98	0.2	3.63	9.34	11.06	7.06	23	819	4.13	624.6	7.1	93.8	0.17	1.76	75.4	2.19	0.74	0.19	5.3	9.44	25.94	3.18	14.22	2.61	0.84	1.94	0.26	1.22	0.22	0.56	0.5	0.08	52.5	65.8	0.51	4.77
CN37-ABA_20_03	CN37	Los Pelambres	21.9 Ma	355172	6380382	63.18	0.6	18.69	4.37	0.05	1.6	4.88	1.45	4.98	0.2	3.63	9.34	11.06	7.06	23	819	4.13	624.6	7.1	93.8	0.17	1.76	75.4	2.19	0.74	0.19	5.3	9.44	25.94	3.18	14.22	2.61	0.84	1.94	0.26	1.22	0.22	0.56	0.5	0.08	52.5	65.8	0.51	4.77
CN37-ABA_20_04	CN37	Los Pelambres	21.9 Ma	355172	6380382	63.18	0.6	18.69	4.37	0.05	1.6	4.88	1.45	4.98	0.2	3.63	9.34	11.06	7.06	23	819	4.13	624.6	7.1	93.8	0.17	1.76	75.4	2.19	0.74	0.19	5.3	9.44	25.94	3.18	14.22	2.61	0.84	1.94	0.26	1.22	0.22	0.56	0.5	0.08	52.5	65.8	0.51	4.77
CN37-ABA_21_09	CN37	Los Pelambres	21.9 Ma	355172	6380382	63.18	0.6	18.69	4.37	0.05	1.6	4.88	1.45	4.98	0.2	3.63	9.34	11.06	7.06	23	819	4.13	624.6	7.1	93.8	0.17	1.76	75.4	2.19	0.74	0.19	5.3	9.44	25.94	3.18	14.22	2.61	0.84	1.94	0.26	1.22	0.22	0.56	0.5	0.08	52.5	65.8	0.51	4.77
CN37-ABA_21_10	CN37	Los Pelambres	21.9 Ma	355172	6380382	63.18	0.6	18.69	4.37	0.05	1.6	4.88	1.45	4.98	0.2	3.63	9.34	11.06	7.06	23	819	4.13	624.6	7.1	93.8	0.17	1.76	75.4	2.19	0.74	0.19	5.3	9.44	25.94	3.18	14.22	2.61	0.84	1.94	0.26	1.22	0.22	0.56	0.5	0.08	52.5	65.8	0.51	4.77
CN37-ABA_22_01	CN37	Los Pelambres	21.9 Ma	355172	6380382	63.18	0.6	18.69	4.37	0.05	1.6	4.88	1.45	4.98	0.2	3.63	9.34	11.06	7.06	23	819	4.13	624.6	7.1	93.8	0.17	1.76	75.4	2.19	0.74	0.19	5.3	9.44	25.94	3.18	14.22	2.61	0.84	1.94	0.26	1.22	0.22	0.56	0.5	0.08	52.5	65.8	0.51	4.77
EMPA	CN37	Los Pelambres	21.9 Ma	355172	6380382	63.18	0.6	18.69	4.37	0.05	1.6	4.88	1.45	4.98	0.2	3.63	9.34	11.06	7.06	23	819	4.13	624.6	7.1	93.8	0.17	1.76	75.4	2.19	0.74	0.19	5.3	9.44	25.94	3.18	14.22	2.61	0.84	1.94	0.26	1.22	0.22	0.56	0.5	0.08	52.5	65.8	0.51	4.77
EMPA	CN37	Los Pelambres	21.9 Ma	355172	6380382	63.18	0.6	18.69	4.37	0.05	1.6	4.88	1.45	4.98	0.2	3.63	9.34	11.06	7.06	23	819	4.13	624.6	7.1	93.8	0.17	1.76	75.4	2.19	0.74	0.19	5.3	9.44	25.94	3.18	14.22	2.61	0.84	1.94	0.26	1.22	0.22	0.56	0.5	0.08	52.5	65.8	0.51	4.77
EMPA	CN37	Los Pelambres	21.9 Ma	355172	6380382	63.18	0.6	18.69	4.37	0.05	1.6	4.88	1.45	4.98	0.2	3.63	9.34	11.06	7.06	23	819	4.13	624.6	7.1	93.8	0.17	1.76	75.4	2.19	0.74	0.19	5.3	9.44	25.94	3.18	14.22	2.61	0.84	1.94	0.26	1.22	0.22	0.56	0.5	0.08	52.5	65.8	0.51	4.77
EMPA	CN37	Los Pelambres	21.9 Ma	355172	6380382	63.18	0.6	18.69	4.37	0.05	1.6	4.88	1.45	4.98	0.2	3.63	9.34	11.06	7.06	23	819	4.13	624.6	7.1	93.8	0.17	1.76	75.4	2.19	0.74	0.19	5.3	9.44	25.94	3.18	14.22	2.61	0.84	1.94	0.26	1.22	0.22	0.56	0.5	0.08	52.5	65.8	0.51	4.77
EMPA	CN37	Los Pelambres	21.9 Ma	355172	6380382	63.18	0.6	18.69	4.37	0.05	1.6	4.88	1.45	4.98	0.2	3.63	9.34	11.06	7.06	23	819	4.13	624.6	7.1	93.8	0.17	1.76	75.4	2.19	0.74	0.19	5.3	9.44	25.94	3.18	14.22	2.61	0.84	1.94	0.26	1.22	0.22	0.56	0.5	0.08	52.5	65.8	0.51	4.77
EMPA	CN37	Los Pelambres	21.9 Ma	355172	6380382	63.18	0.6	18.69	4.37	0.05	1.6	4.88	1.45	4.98	0.2	3.63	9.34	11.06	7.06	23	819	4.13	624.6	7.1	93.8	0.17	1.76	75.4	2.19	0.74	0.19	5.3	9.44	25.94	3.18	14.22	2.61	0.84	1.94	0.26	1.22	0.22	0.56	0.5	0.08	52.5	65.8	0.51	4.77
EMPA	CN37	Los Pelambres	21.9 Ma	355172	6380382	63.18	0.6	18.69	4.37	0.05	1.6	4.88	1.45	4.98	0.2	3.63	9.34	11.06	7.06	23	819	4.13	624.6	7.1	93.8	0.17	1.76	75.4	2.19	0.74	0.19	5.3	9.44	25.94	3.18	14.22	2.61	0.84	1.94	0.26	1.22	0.22	0.56	0.5	0.08	52.5	65.8	0.51	4.77
EMPA	CN37	Los Pelambres	21.9 Ma	355172	6380382	63.18	0.6	18.69	4.37	0.05	1.6	4.88	1.45	4.98	0.2	3.63	9.34	11.06	7.06	23	819	4.13	624.6	7.1	93.8	0.17	1.76	75.4	2.19	0.74	0.19	5.3	9.44	25.94	3.18	14.22	2.61	0.84	1.94	0.26	1.22	0.22	0.56	0.5	0.08	52.5	65.8	0.51	4.77
EMPA	CN37	Los Pelambres	21.9 Ma	355172	6380382	63.18	0.6	18.69	4.37	0.05	1.6	4.88	1.45	4.98	0.2	3.63	9.34	11.06	7.06	23	819	4.13	624.6	7.1	93.8	0.17	1.76	75.4	2.19	0.74	0.19	5.3	9.44	25.94	3.18	14.22	2.61	0.84	1.94	0.26	1.22	0.22	0.56	0.5	0.08	52.5	65.8	0.51	4.77
EMPA	CN37	Los Pelambres	21.9 Ma	355172	6380382	63.18	0.6	18.69	4.37	0.05	1.6	4.88	1.45	4.98	0.2	3.63	9.34	11.06	7.06	23	819	4.13	624.6	7.1	93.8	0.17	1.76	75.4	2.19	0.74	0.19	5.3	9.44	25.94	3.18	14.22	2.61	0.84	1.94	0.26	1.22	0.22	0.56	0.5	0.08	52.5	65.8	0.51	4.77
EMPA	CN37	Los Pelambres	21.9 Ma	355172	6380382	63.18	0.6	18.69	4.37	0.05	1.6	4.88	1.45	4.98	0.2	3.63	9.34	11.06	7.06	23	819	4.13	624.6	7.1	93.8	0.17	1.76	75.4	2.19	0.74	0.19	5.3	9.44	25.94	3.18	14.22	2.61	0.84	1.94	0.26	1.22	0.22	0.56	0.5	0.08	52.5	65.8	0.51	4.77
EMPA	CN37	Los Pelambres	21.9 Ma	355172	6380382	63.18	0.6	18.69	4.37	0.05	1.6	4.88	1.45	4.98	0.2	3.63	9.34	11.06	7.06	23	819	4.13	624.6	7.1	93.8	0.17	1.76	75.4	2.19	0.74	0.19	5.3	9.44	25.94	3.18	14.22	2.61	0.84	1.94	0.26	1.22	0.22	0.56	0.5	0.08	52.5	65.8	0.51	4.77
EMPA	CN37	Los Pelambres	21.9 Ma	355172	6380382	63.18	0.6	18.69	4.37	0.05	1.6	4.88	1.45	4.98	0.2	3.63	9.34	11.06	7.06	23	819	4.13	624.6	7.1	93.8	0.17	1.76	75.4	2.19	0.74	0.19	5.3	9.44	25.94	3.18	14.22	2.61	0.84	1.94	0.26	1.22	0.22	0.56	0.5	0.08	52.5	65.8	0.51	4.77
EMPA	CN37	Los Pelambres	21.9 Ma	355172	6380382	63.18	0.6	18.69	4.37	0.05	1.6	4.88	1.45	4.98	0.2	3.63	9.34	11.06	7.06	23	819	4.13	624.6	7.1	93.8	0.17	1.76	75.4	2.19	0.74	0.19	5.3	9.44	25.94	3.18	14.22	2.61	0.84	1.94	0.26	1.22	0.22	0.56	0.5	0.08	52.5	65.8	0.51	4.77
EMPA	CN37	Los Pelambres	21.9 Ma	355172	6380382	63.18	0.6	18.69	4.37	0.05	1.6	4.88	1.45	4.98	0.2	3.63	9.34	11.06	7.06	23	819	4.13	624.6	7.1	93.8	0.17	1.76	75.4	2.19	0.74	0.19	5.3	9.44	25.94	3.18	14.22	2.61	0.84	1.94	0.26	1.22	0.22	0.56	0.5	0.08	52.5	65.8	0.51	4.77
CN40_ABA_TS_01_09	CN40	Los Pelambres	23.1-16.8 Ma	357339	6384670	64.86	0.43	17.67	4.24	0.11	1.42	3.63	1.77	5.57	0.3	1.51	2.13	6.58	2.41	34	573	1.16	558	4.6	32.3	0.31	4.16	159.2	4.38	3.2	0.93	14.1	18.57	41.22	5.45	20.71	4.06	1.12	3.15	0.44	2.56	0.51	1.47	1.51	0.24	93.7	10.8	0.7	9.54
CN40_ABA_TS_02_01	CN40	Los Pelambres	23.1-16.8 Ma	357339	6384670	64.86	0.43	17.67	4.24	0.11	1.42	3.63	1.77	5.57	0.3	1.51	2.13	6.58	2.41	34	573	1.16	558	4.6	32.3	0.31	4.16	159.2	4.38	3.2	0.93	14.1	18.57	41.22	5.45	20.71	4.06	1.12	3.15	0.44	2.56	0.51	1.47	1.51	0.24	93.7	10.8	0.7	9.54
CN40_ABA_TS_02_03	CN40	Los Pelambres	23.1-16.8 Ma	357339	6384670	64.86	0.43	17.67	4.24	0.11	1.42	3.63	1.77	5.57	0.3	1.51	2.13	6.58	2.41	34	573	1.16	558	4.6	32.3	0.31	4.16	159.2	4.38	3.2	0.93	14.1	18.57	41.22	5.45	20.71	4.06	1.12	3.15	0.44	2.56	0.51	1.47	1.51	0.24	93.7	10.8	0.7	9.54
CN40_ABA_TS_02_04	CN40	Los Pelambres	23.1-16.8 Ma	357339	6384670	64.86	0.43	17.67	4.24	0.11	1.42	3.63	1.77	5.57	0.3	1.51	2.13	6.58	2.41	34	573	1.16	558	4.6	32.3	0.31	4.16	159.2	4.38	3.2	0.93	14.1	18.57	41.22	5.45	20.71	4.06	1.12	3.15	0.44	2.56	0.51	1.47	1.51	0.24	93.7	10.8	0.7	9.54
CN40_ABA_TS_04_01	CN40	Los Pelambres	23.1-16.8 Ma	357339	6384670	64.86	0.43	17.67	4.24	0.11	1.42	3.63	1.77	5.57	0.3	1.51	2.13	6.58	2.41	34	573	1.16	558	4.6	32.3	0.31	4.16	159.2	4.38	3.2	0.93	14.1	18.57	41.22	5.45	20.71	4.06	1.12	3.15	0.44	2.56	0.51	1.47	1.51	0.24	93.7	10.8	0.7	9.54
CN40_ABA_TS_06_01	CN40	Los Pelambres	23.1-16.8 Ma	357339	6384670	64.86	0.43	17.67	4.24	0.11	1.42	3.63	1.77	5.57	0.3	1.51	2.13	6.58	2.41	34	573	1.16	558	4.6	32.3	0.31	4.16	159.2	4.38	3.2	0.93	14.1	18.57	41.22	5.45	20.71	4.06	1.12	3.15	0.44	2.56	0.51	1.47	1.51	0.24	93.7	10.8	0.7	9.54
CN40_ABA_TS_06_02	CN40	Los Pelambres	23.1-16.8 Ma	357339	6384670	64.86	0.43	17.67	4.24	0.11	1.42	3.63	1.77	5.57	0.3	1.51	2.13	6.58	2.41	34	573	1.16	558	4.6	32.3	0.31	4.16	159.2	4.38	3.2	0.93	14.1	18.57	41.22	5.45	20.71	4.06	1.12	3.15	0.44	2.56	0.51	1.47	1.51	0.24	93.7	10.8	0.7	9.54
CN40_ABA_TS_07_06	CN40	Los Pelambres	23.1-16.8 Ma	357339	6384670	64.86	0.43	17.67	4.24	0.11	1.42	3.63	1.77	5.57	0.3	1.51	2.13	6.58	2.41	34	573	1.16	558	4.6	32.3	0.31	4.16	159.2	4.38	3.2	0.93	14.1	18.57	41.22	5.45	20.71	4.06	1.12	3.15	0.44	2.56	0.51	1.47	1.51	0.24	93.7	10.8	0.7	9.54
CN40_ABA_TS_08_03	CN40	Los Pelambres	23.1-16.8 Ma	357339	6384670	64.86	0.43	17.67	4.24	0.11	1.42	3.63	1.77	5.57	0.3	1.51	2.13	6.58	2.41	34	573	1.16	558	4.6	32.3	0.31	4.16	159.2	4.38	3.2	0.93	14.1	18.57	41.22	5.45	20.71	4.06	1.12	3.15	0.44	2.56	0.51	1.47	1.51	0.24	93.7	10.8	0.7	9.54
CN40_ABA_TS_09_01	CN40	Los Pelambres	23.1-16.8 Ma	357339	6384670	64.86	0.43	17.67	4.24	0.11	1.42	3.63	1.77	5.57	0.3	1.51	2.13	6.58	2.41	34	573	1.16	558	4.6	32.3	0.31	4.16	159.2	4.38	3.2	0.93	14.1	18.57	41.22	5.45	20.71	4.06	1.12	3.15	0.44	2.56	0.51	1.47	1.51	0.24	93.7	10.8	0.7	9.54
CN40_ABA_TS_09_05	CN40	Los Pelambres	23.1-16.8 Ma	357339	6384670	64.86	0.43	17.67	4.24	0.11	1.42	3.63	1.77	5.57	0.3	1.51	2.13	6.58	2.41	34	573	1.16	558	4.6	32.3	0.31	4.16	159.2	4.38	3.2	0.93	14.1	18.57	41.22	5.45	20.71	4.06	1.12	3.15	0.44	2.56	0.51	1.47	1.51	0.24	93.7	10.8	0.7	9.54
CN40_ABA_TS_09_06	CN40	Los Pelambres	23.1-16.8 Ma	357339	6384670	64.86	0.43	17.67	4.24	0.11	1.42	3.63	1.77	5.57	0.3	1.51	2.13	6.58	2.41	34	573	1.16	558	4.6	32.3	0.31	4.16	159.2	4.38	3.2	0.93	14.1	18.57	41.22	5.45	20.71	4.06	1.12	3.15	0.44	2.56	0.51	1.47	1.51	0.24	93.7	10.8	0.7	9.54
CN40_ABA_TS_11_03	CN40	Los Pelambres	23.1-16.8 Ma	357339	6384670	64.86	0.43	17.67	4.24	0.11	1.42	3.63	1.77	5.57	0.3	1.51	2.13	6.58	2.41	34	573	1.16	558	4.6	32.3	0.31	4.16	159.2	4.38	3.2	0.93	14.1	18.57	41.22	5.45	20.71	4.06	1.12	3.15	0.44	2.56	0.51	1.47	1.51	0.24	93.7	10.8	0.7	9.54
CN40_ABA_TS_11_08	CN40	Los Pelambres	23.1-16.8 Ma	357339	6384670	64.86	0.43	17.67	4.24	0.11	1.42	3.63	1.77	5.57	0.3	1.51	2.13	6.58	2.41	34	573	1.16	558	4.6	32.3	0.31	4.16	159.2	4.38	3.2	0.93	14.1	18.57	41.22	5.45	20.71	4.06	1.12	3.15	0.44	2.56	0.51	1.47	1.51	0.24	93.7	10.8	0.7	9.54
CN40_ABA_TS_13_01	CN40	Los Pelambres	23.1-16.8 Ma	357339	6384670	64.86	0.43	17.67	4.24	0.11	1.42	3.63	1.77	5.57	0.3	1.51	2.13	6.58	2.41	34	573	1.16	558	4.6	32.3	0.31	4.16	159.2	4.38	3.2	0.93	14.1	18.57	41.22	5.45	20.71	4.06	1.12	3.15	0.44	2.56	0.51	1.47	1.51	0.24	93.7	10.8	0.7	9.54
CN40_ABA_TS_15_01	CN40	Los Pelambres	23.1-16.8 Ma	357339	6384670	64.86	0.43	17.67	4.24	0.11	1.42	3.63	1.77	5.57	0.3	1.51	2.13	6.58	2.41	34	573	1.16	558	4.6	32.3	0.31	4.16	159.2	4.38	3.2	0.93	14.1	18.57	41.22	5.45	20.71	4.06	1.12	3.15	0.44	2.56	0.51	1.47	1.51	0.24	93.7	10.8	0.7	9.54
CN40_ABA_TS_15_02	CN40	Los Pelambres	23.1-16.8 Ma	357339	6384670	64.86	0.43	17.67	4.24	0.11	1.42	3.63	1.77	5.57	0.3	1.51	2.13	6.58	2.41	34	573	1.16	558	4.6	32.3	0.31	4.16	159.2	4.38	3.2	0.93	14.1	18.57	41.22	5.45	20.71	4.06	1.12	3.15	0.44	2.56	0.51	1.47	1.51	0.24	93.7	10.8	0.7	9.54
CN40_ABA_TS_17_01	CN40	Los Pelambres	23.1-16.8 Ma	357339	6384670	64.86	0.43	17.67	4.24	0.11	1.42	3.63	1.77	5.57	0.3	1.51	2.13	6.58	2.41	34	573	1.16	558	4.6	32.3	0.31	4.16	159.2	4.38	3.2	0.93	14.1	18.57	41.22	5.45	20.71	4.06	1.12	3.15	0.44	2.56	0.51	1.47	1.51	0.24	93.7	10.8	0.7	9.54
EMPA	CN40	Los Pelambres	23.1-16.8 Ma	357339	6384670	64.86	0.43	17.67	4.24	0.11	1.42	3.63	1.77	5.57	0.3	1.51	2.13	6.58	2.41	34	573	1.16	558	4.6	32.3	0.31	4.16	159.2	4.38	3.2	0.93	14.1	18.57	41.22	5.45	20.71	4.06	1.12	3.15	0.44	2.56	0.51	1.47	1.51	0.24	93.7	10.8	0.7	9.54
EMPA	CN40	Los Pelambres	23.1-16.8 Ma	357339	6384670	64.86	0.43	17.67	4.24	0.11	1.42	3.63	1.77	5.57	0.3	1.51	2.13	6.58	2.41	34	573	1.16	558	4.6	32.3	0.31	4.16	159.2	4.38	3.2	0.93	14.1	18.57	41.22	5.45	20.71	4.06	1.12	3.15	0.44	2.56	0.51	1.47	1.51	0.24	93.7	10.8	0.7	9.54
EMPA	CN40	Los Pelambres	23.1-16.8 Ma	357339	6384670	64.86	0.43	17.67	4.24	0.11	1.42	3.63	1.77	5.57	0.3	1.51	2.13	6.58	2.41	34	573	1.16	558	4.6	32.3	0.31	4.16	159.2	4.38	3.2	0.93	14.1	18.57	41.22	5.45	20.71	4.06	1.12	3.15	0.44	2.56	0.51	1.47	1.51	0.24	93.7	10.8	0.7	9.54
EMPA	CN40	Los Pelambres	23.1-16.8 Ma	357339	6384670	64.86	0.43	17.67	4.24	0.11	1.42	3.63	1.77	5.57	0.3	1.51	2.13	6.58	2.41	34	573	1.16	558	4.6	32.3	0.31	4.16	159.2	4.38	3.2	0.93	14.1	18.57	41.22	5.45	20.71	4.06	1.12	3.15	0.44	2.56	0.51	1.47	1.51	0.24	93.7	10.8	0.7	9.54
EMPA	CN40	Los Pelambres	23.1-16.8 Ma	357339	6384670	64.86	0.43	17.67	4.24	0.11	1.42	3.63	1.77	5.57	0.3	1.51	2.13	6.58	2.41	34	573	1.16	558	4.6	32.3	0.31	4.16	159.2	4.38	3.2	0.93	14.1	18.57	41.22	5.45	20.71	4.06	1.12	3.15	0.44	2.56	0.51	1.47	1.51	0.24	93.7	10.8	0.7	9.54
EMPA	CN40	Los Pelambres	23.1-16.8 Ma	357339	6384670	64.86	0.43	17.67	4.24	0.11	1.42	3.63	1.77	5.57	0.3	1.51	2.13	6.58	2.41	34	573	1.16	558	4.6	32.3	0.31	4.16	159.2	4.38	3.2	0.93	14.1	18.57	41.22	5.45	20.71	4.06	1.12	3.15	0.44	2.56	0.51	1.47	1.51	0.24	93.7	10.8	0.7	9.54
EMPA	CN40	Los Pelambres	23.1-16.8 Ma	357339	6384670	64.86	0.43	17.67	4.24	0.11	1.42	3.63	1.77	5.57	0.3	1.51	2.13	6.58	2.41	34	573	1.16	558	4.6	32.3	0.31	4.16	159.2	4.38	3.2	0.93	14.1	18.57	41.22	5.45	20.71	4.06	1.12	3.15	0.44	2.56	0.51	1.47	1.51	0.24	93.7	10.8	0.7	9.54
EMPA	CN40	Los Pelambres	23.1-16.8 Ma	357339	6384670	64.86	0.43	17.67	4.24	0.11	1.42	3.63	1.77	5.57	0.3	1.51	2.13	6.58	2.41	34	573	1.16	558	4.6	32.3	0.31	4.16	159.2	4.38	3.2	0.93	14.1	18.57	41.22	5.45	20.71	4.06	1.12	3.15	0.44	2.56	0.51	1.47	1.51	0.24	93.7	10.8	0.7	9.54
EMPA	CN40	Los Pelambres	23.1-16.8 Ma	357339	6384670	64.86	0.43	17.67	4.24	0.11	1.42	3.63	1.77	5.57	0.3	1.51	2.13	6.58	2.41	34	573	1.16	558	4.6	32.3	0.31	4.16	159.2	4.38	3.2	0.93	14.1	18.57	41.22	5.45	20.71	4.06	1.12	3.15	0.44	2.56	0.51	1.47	1.51	0.24	93.7	10.8	0.7	9.54
EMPA	CN40	Los Pelambres	23.1-16.8 Ma	357339	6384670	64.86	0.43	17.67	4.24	0.11	1.42	3.63	1.77	5.57	0.3	1.51	2.13	6.58	2.41	34	573	1.16	558	4.6	32.3	0.31	4.16	159.2	4.38	3.2	0.93	14.1	18.57	41.22	5.45	20.71	4.06	1.12	3.15	0.44	2.56	0.51	1.47	1.51	0.24	93.7	10.8	0.7	9.54
EMPA	CN40	Los Pelambres	23.1-16.8 Ma	357339	6384670	64.86	0.43	17.67	4.24	0.11	1.42	3.63	1.77	5.57	0.3	1.51	2.13	6.58	2.41	34	573	1.16	558	4.6	32.3	0.31	4.16	159.2	4.38	3.2	0.93	14.1	18.57	41.22	5.45	20.71	4.06	1.12	3.15	0.44	2.56	0.51	1.47	1.51	0.24	93.7	10.8	0.7	9.54
EMPA	CN40	Los Pelambres	23.1-16.8 Ma	357339	6384670	64.86	0.43	17.67	4.24	0.11	1.42	3.63	1.77	5.57	0.3	1.51	2.13	6.58	2.41	34	573	1.16	558	4.6	32.3	0.31	4.16	159.2	4.38	3.2	0.93	14.1	18.57	41.22	5.45	20.71	4.06	1.12	3.15	0.44	2.56	0.51	1.47	1.51	0.24	93.7	10.8	0.7	9.54
EMPA	CN40	Los Pelambres	23.1-16.8 Ma	357339	6384670	64.86	0.43	17.67	4.24	0.11	1.42	3.63	1.77	5.57	0.3	1.51	2.13	6.58	2.41	34	573	1.16	558	4.6	32.3	0.31	4.16	159.2	4.38	3.2	0.93	14.1	18.57	41.22	5.45	20.71	4.06	1.12	3.15	0.44	2.56	0.51	1.47	1.51	0.24	93.7	10.8	0.7	9.54
EMPA	CN40	Los Pelambres	23.1-16.8 Ma	357339	6384670	64.86	0.43	17.67	4.24	0.11	1.42	3.63	1.77	5.57	0.3	1.51	2.13	6.58	2.41	34	573	1.16	558	4.6	32.3	0.31	4.16	159.2	4.38	3.2	0.93	14.1	18.57	41.22	5.45	20.71	4.06	1.12	3.15	0.44	2.56	0.51	1.47	1.51	0.24	93.7	10.8	0.7	9.54
EMPA	CN40	Los Pelambres	23.1-16.8 Ma	357339	6384670	64.86	0.43	17.67	4.24	0.11	1.42	3.63	1.77	5.57	0.3	1.51	2.13	6.58	2.41	34	573	1.16	558	4.6	32.3	0.31	4.16	159.2	4.38	3.2	0.93	14.1	18.57	41.22	5.45	20.71	4.06	1.12	3.15	0.44	2.56	0.51	1.47	1.51	0.24	93.7	10.8	0.7	9.54
EMPA	CN40	Los Pelambres	23.1-16.8 Ma	357339	6384670	64.86	0.43	17.67	4.24	0.11	1.42	3.63	1.77	5.57	0.3	1.51	2.13	6.58	2.41	34	573	1.16	558	4.6	32.3	0.31	4.16	159.2	4.38	3.2	0.93	14.1	18.57	41.22	5.45	20.71	4.06	1.12	3.15	0.44	2.56	0.51	1.47	1.51	0.24	93.7	10.8	0.7	9.54
EMPA	CN40	Los Pelambres	23.1-16.8 Ma	357339	6384670	64.86	0.43	17.67	4.24	0.11	1.42	3.63	1.77	5.57	0.3	1.51	2.13	6.58	2.41	34	573	1.16	558	4.6	32.3	0.31	4.16	159.2	4.38	3.2	0.93	14.1	18.57	41.22	5.45	20.71	4.06	1.12	3.15	0.44	2.56	0.51	1.47	1.51	0.24	93.7	10.8	0.7	9.54
EMPA	CN40	Los Pelambres	23.1-16.8 Ma	357339	6384670	64.86	0.43	17.67	4.24	0.11	1.42	3.63	1.77	5.57	0.3	1.51	2.13	6.58	2.41	34	573	1.16	558	4.6	32.3	0.31	4.16	159.2	4.38	3.2	0.93	14.1	18.57	41.22	5.45	20.71	4.06	1.12	3.15	0.44	2.56	0.51	1.47	1.51	0.24	93.7	10.8	0.7	9.54
EMPA	CN40	Los Pelambres	23.1-16.8 Ma	357339	6384670	64.86	0.43	17.67	4.24	0.11	1.42	3.63	1.77	5.57	0.3	1.51	2.13	6.58	2.41	34	573	1.16	558	4.6	32.3	0.31	4.16	159.2	4.38	3.2	0.93	14.1	18.57	41.22	5.45	20.71	4.06	1.12	3.15	0.44	2.56	0.51	1.47	1.51	0.24	93.7	10.8	0.7	9.54
EMPA	CN40	Los Pelambres	23.1-16.8 Ma	357339	6384670	64.86	0.43	17.67	4.24	0.11	1.42	3.63	1.77	5.57	0.3	1.51	2.13	6.58	2.41	34	573	1.16	558	4.6	32.3	0.31	4.16	159.2	4.38	3.2	0.93	14.1	18.57	41.22	5.45	20.71	4.06	1.12	3.15	0.44	2.56	0.51	1.47	1.51	0.24	93.7	10.8	0.7	9.54
EMPA	CN40	Los Pelambres	23.1-16.8 Ma	357339	6384670	64.86	0.43	17.67	4.24	0.11	1.42	3.63	1.77	5.57	0.3	1.51	2.13	6.58	2.41	34	573	1.16	558	4.6	32.3	0.31	4.16	159.2	4.38	3.2	0.93	14.1	18.57	41.22	5.45	20.71	4.06	1.12	3.15	0.44	2.56	0.51	1.47	1.51	0.24	93.7	10.8	0.7	9.54
EMPA	CN40	Los Pelambres	23.1-16.8 Ma	357339	6384670	64.86	0.43	17.67	4.24	0.11	1.42	3.63	1.77	5.57	0.3	1.51	2.13	6.58	2.41	34	573	1.16	558	4.6	32.3	0.31	4.16	159.2	4.38	3.2	0.93	14.1	18.57	41.22	5.45	20.71	4.06	1.12	3.15	0.44	2.56	0.51	1.47	1.51	0.24	93.7	10.8	0.7	9.54
EMPA	CN40	Los Pelambres	23.1-16.8 Ma	357339	6384670	64.86	0.43	17.67	4.24	0.11	1.42	3.63	1.77	5.57	0.3	1.51	2.13	6.58	2.41	34	573	1.16	558	4.6	32.3	0.31	4.16	159.2	4.38	3.2	0.93	14.1	18.57	41.22	5.45	20.71	4.06	1.12	3.15	0.44	2.56	0.51	1.47	1.51	0.24	93.7	10.8	0.7	9.54
EMPA	CN40	Los Pelambres	23.1-16.8 Ma	357339	6384670	64.86	0.43	17.67	4.24	0.11	1.42	3.63	1.77	5.57	0.3	1.51	2.13	6.58	2.41	34	573	1.16	558	4.6	32.3	0.31	4.16	159.2	4.38	3.2	0.93	14.1	18.57	41.22	5.45	20.71	4.06	1.12	3.15	0.44	2.56	0.51	1.47	1.51	0.24	93.7	10.8	0.7	9.54
EMPA	CN40	Los Pelambres	23.1-16.8 Ma	357339	6384670	64.86	0.43	17.67	4.24	0.11	1.42	3.63	1.77	5.57	0.3	1.51	2.13	6.58	2.41	34	573	1.16	558	4.6	32.3	0.31	4.16	159.2	4.38	3.2	0.93	14.1	18.57	41.22	5.45	20.71	4.06	1.12	3.15	0.44	2.56	0.51	1.47	1.51	0.24	93.7	10.8	0.7	9.54
EMPA	CN40	Los Pelambres	23.1-16.8 Ma	357339	6384670	64.86	0.43	17.67	4.24	0.11	1.42	3.63	1.77	5.57	0.3	1.51	2.13	6.58	2.41	34	573	1.16	558	4.6	32.3	0.31	4.16	159.2	4.38	3.2	0.93	14.1	18.57	41.22	5.45	20.71	4.06	1.12	3.15	0.44	2.56	0.51	1.47	1.51	0.24	93.7	10.8	0.7	9.54
EMPA	CN40	Los Pelambres	23.1-16.8 Ma	357339	6384670	64.86	0.43	17.67	4.24	0.11	1.42	3.63	1.77	5.57	0.3	1.51	2.13	6.58	2.41	34	573	1.16	558	4.6	32.3	0.31	4.16	159.2	4.38	3.2	0.93	14.1	18.57	41.22	5.45	20.71	4.06	1.12	3.15	0.44	2.56	0.51	1.47	1.51	0.24	93.7	10.8	0.7	9.54
EMPA	CN40	Los Pelambres	23.1-16.8 Ma	357339	6384670	64.86	0.43	17.67	4.24	0.11	1.42	3.63	1.77	5.57	0.3	1.51	2.13	6.58	2.41	34	573	1.16	558	4.6	32.3	0.31	4.16	159.2	4.38	3.2	0.93	14.1	18.57	41.22	5.45	20.71	4.06	1.12	3.15	0.44	2.56	0.51	1.47	1.51	0.24	93.7	10.8	0.7	9.54
EMPA	CN40	Los Pelambres	23.1-16.8 Ma	357339	6384670	64.86	0.43	17.67	4.24	0.11	1.42	3.63	1.77	5.57	0.3	1.51	2.13	6.58	2.41	34	573	1.16	558	4.6	32.3	0.31	4.16	159.2	4.38	3.2	0.93	14.1	18.57	41.22	5.45	20.71	4.06	1.12	3.15	0.44	2.56	0.51	1.47	1.51	0.24	93.7	10.8	0.7	9.54
EMPA	CN40	Los Pelambres	23.1-16.8 Ma	357339	6384670	64.86	0.43	17.67	4.24	0.11	1.42	3.63	1.77	5.57	0.3	1.51	2.13	6.58	2.41	34	573	1.16	558	4.6	32.3	0.31	4.16	159.2	4.38	3.2	0.93	14.1	18.57	41.22	5.45	20.71	4.06	1.12	3.15	0.44	2.56	0.51	1.47	1.51	0.24	93.7	10.8	0.7	9.54
EMPA	CN40	Los Pelambres	23.1-16.8 Ma	357339	6384670	64.86	0.43	17.67	4.24	0.11	1.42	3.63	1.77	5.57	0.3	1.51	2.13	6.58	2.41	34	573	1.16	558	4.6	32.3	0.31	4.16	159.2	4.38	3.2	0.93	14.1	18.57	41.22	5.45	20.71	4.06	1.12	3.15	0.44	2.56	0.51	1.47	1.51	0.24	93.7	10.8	0.7	9.54
EMPA	CN40	Los Pelambres	23.1-16.8 Ma	357339	6384670	64.86	0.43	17.67	4.24	0.11	1.42	3.63	1.77	5.57	0.3	1.51	2.13	6.58	2.41	34	573	1.16	558	4.6	32.3	0.31	4.16	159.2	4.38	3.2	0.93	14.1	18.57	41.22	5.45	20.71	4.06	1.12	3.15	0.44	2.56	0.51	1.47	1.51	0.24	93.7	10.8	0.7	9.54
EMPA	CN40	Los Pelambres	23.1-16.8 Ma	357339	6384670	64.86	0.43	17.67	4.24	0.11	1.42	3.63	1.77	5.57	0.3	1.51	2.13	6.58	2.41	34	573	1.16	558	4.6	32.3	0.31	4.16	159.2	4.38	3.2	0.93	14.1	18.57	41.22	5.45	20.71	4.06	1.12	3.15	0.44	2.56	0.51	1.47	1.51	0.24	93.7	10.8	0.7	9.54
EMPA	CN40	Los Pelambres	23.1-16.8 Ma	357339	6384670	64.86	0.43	17.67	4.24	0.11	1.42	3.63	1.77	5.57	0.3	1.51	2.13	6.58	2.41	34	573	1.16	558	4.6	32.3	0.31	4.16	159.2	4.38	3.2	0.93	14.1	18.57	41.22	5.45	20.71	4.06	1.12	3.15	0.44	2.56	0.51	1.47	1.51	0.24	93.7	10.8	0.7	9.54
EMPA	CN40	Los Pelambres	23.1-16.8 Ma	357339	6384670	64.86	0.43	17.67	4.24	0.11	1.42	3.63	1.77	5.57	0.3	1.51	2.13	6.58	2.41	34	573	1.16	558	4.6	32.3	0.31	4.16	159.2	4.38	3.2	0.93	14.1	18.57	41.22	5.45	20.71	4.06	1.12	3.15	0.44	2.56	0.51	1.47	1.51	0.24	93.7	10.8	0.7	9.54
EMPA	CN40	Los Pelambres	23.1-16.8 Ma	357339	6384670	64.86	0.43	17.67	4.24	0.11	1.42	3.63	1.77	5.57	0.3	1.51	2.13	6.58	2.41	34	573	1.16	558	4.6	32.3	0.31	4.16	159.2	4.38	3.2	0.93	14.1	18.57	41.22	5.45	20.71	4.06	1.12	3.15	0.44	2.56	0.51	1.47	1.51	0.24	93.7	10.8	0.7	9.54
EMPA	CN40	Los Pelambres	23.1-16.8 Ma	357339	6384670	64.86	0.43	17.67	4.24	0.11	1.42	3.63	1.77	5.57	0.3	1.51	2.13	6.58	2.41	34	573	1.16	558	4.6	32.3	0.31	4.16	159.2	4.38	3.2	0.93	14.1	18.57	41.22	5.45	20.71	4.06	1.12	3.15	0.44	2.56	0.51	1.47	1.51	0.24	93.7	10.8	0.7	9.54
EMPA	CN40	Los Pelambres	23.1-16.8 Ma	357339	6384670	64.86	0.43	17.67	4.24	0.11	1.42	3.63	1.77	5.57	0.3	1.51	2.13	6.58	2.41	34	573	1.16	558	4.6	32.3	0.31	4.16	159.2	4.38	3.2	0.93	14.1	18.57	41.22	5.45	20.71	4.06	1.12	3.15	0.44	2.56	0.51	1.47	1.51	0.24	93.7	10.8	0.7	9.54
EMPA	CN40	Los Pelambres	23.1-16.8 Ma	357339	6384670	64.86	0.43	17.67	4.24	0.11	1.42	3.63	1.77	5.57	0.3	1.51	2.13	6.58	2.41	34	573	1.16	558	4.6	32.3	0.31	4.16	159.2	4.38	3.2	0.93	14.1	18.57	41.22	5.45	20.71	4.06	1.12	3.15	0.44	2.56	0.51	1.47	1.51	0.24	93.7	10.8	0.7	9.54
EMPA	CN40	Los Pelambres	23.1-16.8 Ma	357339	6384670	64.86	0.43	17.67	4.24	0.11	1.42	3.63	1.77	5.57	0.3	1.51	2.13	6.58	2.41	34	573	1.16	558	4.6	32.3	0.31	4.16	159.2	4.38	3.2	0.93	14.1	18.57	41.22	5.45	20.71	4.06	1.12	3.15	0.44	2.56	0.51	1.47	1.51	0.24	93.7	10.8	0.7	9.54
EMPA	CN40	Los Pelambres	23.1-16.8 Ma	357339	6384670	64.86	0.43	17.67	4.24	0.11	1.42	3.63	1.77	5.57	0.3	1.51	2.13	6.58	2.41	34	573	1.16	558	4.6	32.3	0.31	4.16	159.2	4.38	3.2	0.93	14.1	18.57	41.22	5.45	20.71	4.06	1.12	3.15	0.44	2.56	0.51	1.47	1.51	0.24	93.7	10.8	0.7	9.54
EMPA	CN40	Los Pelambres	23.1-16.8 Ma	357339	6384670	64.86	0.43	17.67	4.24	0.11	1.42	3.63	1.77	5.57	0.3	1.51	2.13	6.58	2.41	34	573	1.16	558	4.6	32.3	0.31	4.16	159.2	4.38	3.2	0.93	14.1	18.57	41.22	5.45	20.71	4.06	1.12	3.15	0.44	2.56	0.51	1.47	1.51	0.24	93.7	10.8	0.7	9.54
EMPA	CN40	Los Pelambres	23.1-16.8 Ma	357339	6384670	64.86	0.43	17.67	4.24	0.11	1.42	3.63	1.77	5.57	0.3	1.51	2.13	6.58	2.41	34	573	1.16	558	4.6	32.3	0.31	4.16	159.2	4.38	3.2	0.93	14.1	18.57	41.22	5.45	20.71	4.06	1.12	3.15	0.44	2.56	0.51	1.47	1.51	0.24	93.7	10.8	0.7	9.54
EMPA	CN40	Los Pelambres	23.1-16.8 Ma	357339	6384670	64.86	0.43	17.67	4.24	0.11	1.42	3.63	1.77	5.57	0.3	1.51	2.13	6.58	2.41	34	573	1.16	558	4.6	32.3	0.31	4.16	159.2	4.38	3.2	0.93	14.1	18.57	41.22	5.45	20.71	4.06	1.12	3.15	0.44	2.56	0.51	1.47	1.51	0.24	93.7	10.8	0.7	9.54
EMPA	CN40	Los Pelambres	23.1-16.8 Ma	357339	6384670	64.86	0.43	17.67	4.24	0.11	1.42	3.63	1.77	5.57	0.3	1.51	2.13	6.58	2.41	34	573	1.16	558	4.6	32.3	0.31	4.16	159.2	4.38	3.2	0.93	14.1	18.57	41.22	5.45	20.71	4.06	1.12	3.15	0.44	2.56	0.51	1.47	1.51	0.24	93.7	10.8	0.7	9.54
EMPA	CN40	Los Pelambres	23.1-16.8 Ma	357339	6384670	64.86	0.43	17.67	4.24	0.11	1.42	3.63	1.77	5.57	0.3	1.51	2.13	6.58	2.41	34	573	1.16	558	4.6	32.3	0.31	4.16	159.2	4.38	3.2	0.93	14.1	18.57	41.22	5.45	20.71	4.06	1.12	3.15	0.44	2.56	0.51	1.47	1.51	0.24	93.7	10.8	0.7	9.54
EMPA	CN40	Los Pelambres	23.1-16.8 Ma	357339	6384670	64.86	0.43	17.67	4.24	0.11	1.42	3.63	1.77	5.57	0.3	1.51	2.13	6.58	2.41	34	573	1.16	558	4.6	32.3	0.31	4.16	159.2	4.38	3.2	0.93	14.1	18.57	41.22	5.45	20.71	4.06	1.12	3.15	0.44	2.56	0.51	1.47	1.51	0.24	93.7	10.8	0.7	9.54
EMPA	CN40	Los Pelambres	23.1-16.8 Ma	357339	6384670	64.86	0.43	17.67	4.24	0.11	1.42	3.63	1.77	5.57	0.3	1.51	2.13	6.58	2.41	34	573	1.16	558	4.6	32.3	0.31	4.16	159.2	4.38	3.2	0.93	14.1	18.57	41.22	5.45	20.71	4.06	1.12	3.15	0.44	2.56	0.51	1.47	1.51	0.24	93.7	10.8	0.7	9.54
EMPA	CN40	Los Pelambres	23.1-16.8 Ma	357339	6384670	64.86	0.43	17.67	4.24	0.11	1.42	3.63	1.77	5.57	0.3	1.51	2.13	6.58	2.41	34	573	1.16	558	4.6	32.3	0.31	4.16	159.2	4.38	3.2	0.93	14.1	18.57	41.22	5.45	20.71	4.06	1.12	3.15	0.44	2.56	0.51	1.47	1.51	0.24	93.7	10.8	0.7	9.54
EMPA	CN40	Los Pelambres	23.1-16.8 Ma	357339	6384670	64.86	0.43	17.67	4.24	0.11	1.42	3.63	1.77	5.57	0.3	1.51	2.13	6.58	2.41	34	573	1.16	558	4.6	32.3	0.31	4.16	159.2	4.38	3.2	0.93	14.1	18.57	41.22	5.45	20.71	4.06	1.12	3.15	0.44	2.56	0.51	1.47	1.51	0.24	93.7	10.8	0.7	9.54
EMPA	CN40	Los Pelambres	23.1-16.8 Ma	357339	6384670	64.86	0.43	17.67	4.24	0.11	1.42	3.63	1.77	5.57	0.3	1.51	2.13	6.58	2.41	34	573	1.16	558	4.6	32.3	0.31	4.16	159.2	4.38	3.2	0.93	14.1	18.57	41.22	5.45	20.71	4.06	1.12	3.15	0.44	2.56	0.51	1.47	1.51	0.24	93.7	10.8	0.7	9.54
EMPA	CN40	Los Pelambres	23.1-16.8 Ma	357339	6384670	64.86	0.43	17.67	4.24	0.11	1.42	3.63	1.77	5.57	0.3	1.51	2.13	6.58	2.41	34	573	1.16	558	4.6	32.3	0.31	4.16	159.2	4.38	3.2	0.93	14.1	18.57	41.22	5.45	20.71	4.06	1.12	3.15	0.44	2.56	0.51	1.47	1.51	0.24	93.7	10.8	0.7	9.54
CN53_FAR_03_02	CN53	Las Chilcas	125-64 Ma	332694	6382660	65.56	0.86	15.26	7.09	0.05	1.24	0.96	5.68	2.77	0.55	2.39	1.64	9.46	1.54	198	126	7.87	842.5	21.8	99.3	0.77	10.86	448.1	11.68	16.39	3.87	44.6	44.06	98.37	13.24	55.84	11.23	1.85	9.66	1.43	8.24	1.65	4.73	4.47	0.68	169.7	7.4	1.29	12.71
CN53_FAR_11_01	CN53	Las Chilcas	125-64 Ma	332694	6382660	65.56	0.86	15.26	7.09	0.05	1.24	0.96	5.68	2.77	0.55	2.39	1.64	9.46	1.54	198	126	7.87	842.5	21.8	99.3	0.77	10.86	448.1	11.68	16.39	3.87	44.6	44.06	98.37	13.24	55.84	11.23	1.85	9.66	1.43	8.24	1.65	4.73	4.47	0.68	169.7	7.4	1.29	12.71
CN53_FAR_11_02	CN53	Las Chilcas	125-64 Ma	332694	6382660	65.56	0.86	15.26	7.09	0.05	1.24	0.96	5.68	2.77	0.55	2.39	1.64	9.46	1.54	198	126	7.87	842.5	21.8	99.3	0.77	10.86	448.1	11.68	16.39	3.87	44.6	44.06	98.37	13.24	55.84	11.23	1.85	9.66	1.43	8.24	1.65	4.73	4.47	0.68	169.7	7.4	1.29	12.71
CN53_FAR_11_03	CN53	Las Chilcas	125-64 Ma	332694	6382660	65.56	0.86	15.26	7.09	0.05	1.24	0.96	5.68	2.77	0.55	2.39	1.64	9.46	1.54	198	126	7.87	842.5	21.8	99.3	0.77	10.86	448.1	11.68	16.39	3.87	44.6	44.06	98.37	13.24	55.84	11.23	1.85	9.66	1.43	8.24	1.65	4.73	4.47	0.68	169.7	7.4	1.29	12.71
CN53_FAR_14_02	CN53	Las Chilcas	125-64 Ma	332694	6382660	65.56	0.86	15.26	7.09	0.05	1.24	0.96	5.68	2.77	0.55	2.39	1.64	9.46	1.54	198	126	7.87	842.5	21.8	99.3	0.77	10.86	448.1	11.68	16.39	3.87	44.6	44.06	98.37	13.24	55.84	11.23	1.85	9.66	1.43	8.24	1.65	4.73	4.47	0.68	169.7	7.4	1.29	12.71
CN53_FAR_16_01	CN53	Las Chilcas	125-64 Ma	332694	6382660	65.56	0.86	15.26	7.09	0.05	1.24	0.96	5.68	2.77	0.55	2.39	1.64	9.46	1.54	198	126	7.87	842.5	21.8	99.3	0.77	10.86	448.1	11.68	16.39	3.87	44.6	44.06	98.37	13.24	55.84	11.23	1.85	9.66	1.43	8.24	1.65	4.73	4.47	0.68	169.7	7.4	1.29	12.71
CN53_FAR_16_02	CN53	Las Chilcas	125-64 Ma	332694	6382660	65.56	0.86	15.26	7.09	0.05	1.24	0.96	5.68	2.77	0.55	2.39	1.64	9.46	1.54	198	126	7.87	842.5	21.8	99.3	0.77	10.86	448.1	11.68	16.39	3.87	44.6	44.06	98.37	13.24	55.84	11.23	1.85	9.66	1.43	8.24	1.65	4.73	4.47	0.68	169.7	7.4	1.29	12.71
CN53_FAR_16_03	CN53	Las Chilcas	125-64 Ma	332694	6382660	65.56	0.86	15.26	7.09	0.05	1.24	0.96	5.68	2.77	0.55	2.39	1.64	9.46	1.54	198	126	7.87	842.5	21.8	99.3	0.77	10.86	448.1	11.68	16.39	3.87	44.6	44.06	98.37	13.24	55.84	11.23	1.85	9.66	1.43	8.24	1.65	4.73	4.47	0.68	169.7	7.4	1.29	12.71
CN53_FAR_16_04	CN53	Las Chilcas	125-64 Ma	332694	6382660	65.56	0.86	15.26	7.09	0.05	1.24	0.96	5.68	2.77	0.55	2.39	1.64	9.46	1.54	198	126	7.87	842.5	21.8	99.3	0.77	10.86	448.1	11.68	16.39	3.87	44.6	44.06	98.37	13.24	55.84	11.23	1.85	9.66	1.43	8.24	1.65	4.73	4.47	0.68	169.7	7.4	1.29	12.71
CN53_FAR_16_07	CN53	Las Chilcas	125-64 Ma	332694	6382660	65.56	0.86	15.26	7.09	0.05	1.24	0.96	5.68	2.77	0.55	2.39	1.64	9.46	1.54	198	126	7.87	842.5	21.8	99.3	0.77	10.86	448.1	11.68	16.39	3.87	44.6	44.06	98.37	13.24	55.84	11.23	1.85	9.66	1.43	8.24	1.65	4.73	4.47	0.68	169.7	7.4	1.29	12.71
CN53_FAR_17_06	CN53	Las Chilcas	125-64 Ma	332694	6382660	65.56	0.86	15.26	7.09	0.05	1.24	0.96	5.68	2.77	0.55	2.39	1.64	9.46	1.54	198	126	7.87	842.5	21.8	99.3	0.77	10.86	448.1	11.68	16.39	3.87	44.6	44.06	98.37	13.24	55.84	11.23	1.85	9.66	1.43	8.24	1.65	4.73	4.47	0.68	169.7	7.4	1.29	12.71
CN53_FAR_18_01	CN53	Las Chilcas	125-64 Ma	332694	6382660	65.56	0.86	15.26	7.09	0.05	1.24	0.96	5.68	2.77	0.55	2.39	1.64	9.46	1.54	198	126	7.87	842.5	21.8	99.3	0.77	10.86	448.1	11.68	16.39	3.87	44.6	44.06	98.37	13.24	55.84	11.23	1.85	9.66	1.43	8.24	1.65	4.73	4.47	0.68	169.7	7.4	1.29	12.71
CN53_FAR_18_02	CN53	Las Chilcas	125-64 Ma	332694	6382660	65.56	0.86	15.26	7.09	0.05	1.24	0.96	5.68	2.77	0.55	2.39	1.64	9.46	1.54	198	126	7.87	842.5	21.8	99.3	0.77	10.86	448.1	11.68	16.39	3.87	44.6	44.06	98.37	13.24	55.84	11.23	1.85	9.66	1.43	8.24	1.65	4.73	4.47	0.68	169.7	7.4	1.29	12.71
EMPA		Las Chilcas	125-64 Ma	332694	6382660	65.56	0.86	15.26	7.09	0.05	1.24	0.96	5.68	2.77	0.55	2.39	1.64	9.46	1.54	198	126	7.87	842.5	21.8	99.3	0.77	10.86	448.1	11.68	16.39	3.87	44.6	44.06	98.37	13.24	55.84	11.23	1.85	9.66	1.43	8.24	1.65	4.73	4.47	0.68	169.7	7.4	1.29	12.71
EMPA		Las Chilcas	125-64 Ma	332694	6382660	65.56	0.86	15.26	7.09	0.05	1.24	0.96	5.68	2.77	0.55	2.39	1.64	9.46	1.54	198	126	7.87	842.5	21.8	99.3	0.77	10.86	448.1	11.68	16.39	3.87	44.6	44.06	98.37	13.24	55.84	11.23	1.85	9.66	1.43	8.24	1.65	4.73	4.47	0.68	169.7	7.4	1.29	12.71
EMPA		Las Chilcas	125-64 Ma	332694	6382660	65.56	0.86	15.26	7.09	0.05	1.24	0.96	5.68	2.77	0.55	2.39	1.64	9.46	1.54	198	126	7.87	842.5	21.8	99.3	0.77	10.86	448.1	11.68	16.39	3.87	44.6	44.06	98.37	13.24	55.84	11.23	1.85	9.66	1.43	8.24	1.65	4.73	4.47	0.68	169.7	7.4	1.29	12.71
EMPA		Las Chilcas	125-64 Ma	332694	6382660	65.56	0.86	15.26	7.09	0.05	1.24	0.96	5.68	2.77	0.55	2.39	1.64	9.46	1.54	198	126	7.87	842.5	21.8	99.3	0.77	10.86	448.1	11.68	16.39	3.87	44.6	44.06	98.37	13.24	55.84	11.23	1.85	9.66	1.43	8.24	1.65	4.73	4.47	0.68	169.7	7.4	1.29	12.71
EMPA		Las Chilcas	125-64 Ma	332694	6382660	65.56	0.86	15.26	7.09	0.05	1.24	0.96	5.68	2.77	0.55	2.39	1.64	9.46	1.54	198	126	7.87	842.5	21.8	99.3	0.77	10.86	448.1	11.68	16.39	3.87	44.6	44.06	98.37	13.24	55.84	11.23	1.85	9.66	1.43	8.24	1.65	4.73	4.47	0.68	169.7	7.4	1.29	12.71
EMPA		Las Chilcas	125-64 Ma	332694	6382660	65.56	0.86	15.26	7.09	0.05	1.24	0.96	5.68	2.77	0.55	2.39	1.64	9.46	1.54	198	126	7.87	842.5	21.8	99.3	0.77	10.86	448.1	11.68	16.39	3.87	44.6	44.06	98.37	13.24	55.84	11.23	1.85	9.66	1.43	8.24	1.65	4.73	4.47	0.68	169.7	7.4	1.29	12.71
EMPA		Las Chilcas	125-64 Ma	332694	6382660	65.56	0.86	15.26	7.09	0.05	1.24	0.96	5.68	2.77	0.55	2.39	1.64	9.46	1.54	198	126	7.87	842.5	21.8	99.3	0.77	10.86	448.1	11.68	16.39	3.87	44.6	44.06	98.37	13.24	55.84	11.23	1.85	9.66	1.43	8.24	1.65	4.73	4.47	0.68	169.7	7.4	1.29	12.71
EMPA		Las Chilcas	125-64 Ma	332694	6382660	65.56	0.86	15.26	7.09	0.05	1.24	0.96	5.68	2.77	0.55	2.39	1.64	9.46	1.54	198	126	7.87	842.5	21.8	99.3	0.77	10.86	448.1	11.68	16.39	3.87	44.6	44.06	98.37	13.24	55.84	11.23	1.85	9.66	1.43	8.24	1.65	4.73	4.47	0.68	169.7	7.4	1.29	12.71
CN53_TS_05_01	CN53	Las Chilcas	125-64 Ma	332694	6382660	65.56	0.86	15.26	7.09	0.05	1.24	0.96	5.68	2.77	0.55	2.39	1.64	9.46	1.54	198	126	7.87	842.5	21.8	99.3	0.77	10.86	448.1	11.68	16.39	3.87	44.6	44.06	98.37	13.24	55.84	11.23	1.85	9.66	1.43	8.24	1.65	4.73	4.47	0.68	169.7	7.4	1.29	12.71
CN53_TS_06_04	CN53	Las Chilcas	125-64 Ma	332694	6382660	65.56	0.86	15.26	7.09	0.05	1.24	0.96	5.68	2.77	0.55	2.39	1.64	9.46	1.54	198	126	7.87	842.5	21.8	99.3	0.77	10.86	448.1	11.68	16.39	3.87	44.6	44.06	98.37	13.24	55.84	11.23	1.85	9.66	1.43	8.24	1.65	4.73	4.47	0.68	169.7	7.4	1.29	12.71
CN53_TS_08_01	CN53	Las Chilcas	125-64 Ma	332694	6382660	65.56	0.86	15.26	7.09	0.05	1.24	0.96	5.68	2.77	0.55	2.39	1.64	9.46	1.54	198	126	7.87	842.5	21.8	99.3	0.77	10.86	448.1	11.68	16.39	3.87	44.6	44.06	98.37	13.24	55.84	11.23	1.85	9.66	1.43	8.24	1.65	4.73	4.47	0.68	169.7	7.4	1.29	12.71
CN53_TS_08_02	CN53	Las Chilcas	125-64 Ma	332694	6382660	65.56	0.86	15.26	7.09	0.05	1.24	0.96	5.68	2.77	0.55	2.39	1.64	9.46	1.54	198	126	7.87	842.5	21.8	99.3	0.77	10.86	448.1	11.68	16.39	3.87	44.6	44.06	98.37	13.24	55.84	11.23	1.85	9.66	1.43	8.24	1.65	4.73	4.47	0.68	169.7	7.4	1.29	12.71
CN53_TS_09_01	CN53	Las Chilcas	125-64 Ma	332694	6382660	65.56	0.86	15.26	7.09	0.05	1.24	0.96	5.68	2.77	0.55	2.39	1.64	9.46	1.54	198	126	7.87	842.5	21.8	99.3	0.77	10.86	448.1	11.68	16.39	3.87	44.6	44.06	98.37	13.24	55.84	11.23	1.85	9.66	1.43	8.24	1.65	4.73	4.47	0.68	169.7	7.4	1.29	12.71
CN53_TS_09_03	CN53	Las Chilcas	125-64 Ma	332694	6382660	65.56	0.86	15.26	7.09	0.05	1.24	0.96	5.68	2.77	0.55	2.39	1.64	9.46	1.54	198	126	7.87	842.5	21.8	99.3	0.77	10.86	448.1	11.68	16.39	3.87	44.6	44.06	98.37	13.24	55.84	11.23	1.85	9.66	1.43	8.24	1.65	4.73	4.47	0.68	169.7	7.4	1.29	12.71
CN53_TS_09_04	CN53	Las Chilcas	125-64 Ma	332694	6382660	65.56	0.86	15.26	7.09	0.05	1.24	0.96	5.68	2.77	0.55	2.39	1.64	9.46	1.54	198	126	7.87	842.5	21.8	99.3	0.77	10.86	448.1	11.68	16.39	3.87	44.6	44.06	98.37	13.24	55.84	11.23	1.85	9.66	1.43	8.24	1.65	4.73	4.47	0.68	169.7	7.4	1.29	12.71
CN53_TS_11_03	CN53	Las Chilcas	125-64 Ma	332694	6382660	65.56	0.86	15.26	7.09	0.05	1.24	0.96	5.68	2.77	0.55	2.39	1.64	9.46	1.54	198	126	7.87	842.5	21.8	99.3	0.77	10.86	448.1	11.68	16.39	3.87	44.6	44.06	98.37	13.24	55.84	11.23	1.85	9.66	1.43	8.24	1.65	4.73	4.47	0.68	169.7	7.4	1.29	12.71
CN53_TS_11_05	CN53	Las Chilcas	125-64 Ma	332694	6382660	65.56	0.86	15.26	7.09	0.05	1.24	0.96	5.68	2.77	0.55	2.39	1.64	9.46	1.54	198	126	7.87	842.5	21.8	99.3	0.77	10.86	448.1	11.68	16.39	3.87	44.6	44.06	98.37	13.24	55.84	11.23	1.85	9.66	1.43	8.24	1.65	4.73	4.47	0.68	169.7	7.4	1.29	12.71
CN53_TS_12_06	CN53	Las Chilcas	125-64 Ma	332694	6382660	65.56	0.86	15.26	7.09	0.05	1.24	0.96	5.68	2.77	0.55	2.39	1.64	9.46	1.54	198	126	7.87	842.5	21.8	99.3	0.77	10.86	448.1	11.68	16.39	3.87	44.6	44.06	98.37	13.24	55.84	11.23	1.85	9.66	1.43	8.24	1.65	4.73	4.47	0.68	169.7	7.4	1.29	12.71
CN53_TS_17_01	CN53	Las Chilcas	125-64 Ma	332694	6382660	65.56	0.86	15.26	7.09	0.05	1.24	0.96	5.68	2.77	0.55	2.39	1.64	9.46	1.54	198	126	7.87	842.5	21.8	99.3	0.77	10.86	448.1	11.68	16.39	3.87	44.6	44.06	98.37	13.24	55.84	11.23	1.85	9.66	1.43	8.24	1.65	4.73	4.47	0.68	169.7	7.4	1.29	12.71
CN53_TS_18_01	CN53	Las Chilcas	125-64 Ma	332694	6382660	65.56	0.86	15.26	7.09	0.05	1.24	0.96	5.68	2.77	0.55	2.39	1.64	9.46	1.54	198	126	7.87	842.5	21.8	99.3	0.77	10.86	448.1	11.68	16.39	3.87	44.6	44.06	98.37	13.24	55.84	11.23	1.85	9.66	1.43	8.24	1.65	4.73	4.47	0.68	169.7	7.4	1.29	12.71
CN53_TS_18_02	CN53	Las Chilcas	125-64 Ma	332694	6382660	65.56	0.86	15.26	7.09	0.05	1.24	0.96	5.68	2.77	0.55	2.39	1.64	9.46	1.54	198	126	7.87	842.5	21.8	99.3	0.77	10.86	448.1	11.68	16.39	3.87	44.6	44.06	98.37	13.24	55.84	11.23	1.85	9.66	1.43	8.24	1.65	4.73	4.47	0.68	169.7	7.4	1.29	12.71
CN53_TS_19_01	CN53	Las Chilcas	125-64 Ma	332694	6382660	65.56	0.86	15.26	7.09	0.05	1.24	0.96	5.68	2.77	0.55	2.39	1.64	9.46	1.54	198	126	7.87	842.5	21.8	99.3	0.77	10.86	448.1	11.68	16.39	3.87	44.6	44.06	98.37	13.24	55.84	11.23	1.85	9.66	1.43	8.24	1.65	4.73	4.47	0.68	169.7	7.4	1.29	12.71
CN53_TS_20_01	CN53	Las Chilcas	125-64 Ma	332694	6382660	65.56	0.86	15.26	7.09	0.05	1.24	0.96	5.68	2.77	0.55	2.39	1.64	9.46	1.54	198	126	7.87	842.5	21.8	99.3	0.77	10.86	448.1	11.68	16.39	3.87	44.6	44.06	98.37	13.24	55.84	11.23	1.85	9.66	1.43	8.24	1.65	4.73	4.47	0.68	169.7	7.4	1.29	12.71
EMPA	CN53	Las Chilcas	125-64 Ma	332694	6382660	65.56	0.86	15.26	7.09	0.05	1.24	0.96	5.68	2.77	0.55	2.39	1.64	9.46	1.54	198	126	7.87	842.5	21.8	99.3	0.77	10.86	448.1	11.68	16.39	3.87	44.6	44.06	98.37	13.24	55.84	11.23	1.85	9.66	1.43	8.24	1.65	4.73	4.47	0.68	169.7	7.4	1.29	12.71
EMPA	CN53	Las Chilcas	125-64 Ma	332694	6382660	65.56	0.86	15.26	7.09	0.05	1.24	0.96	5.68	2.77	0.55	2.39	1.64	9.46	1.54	198	126	7.87	842.5	21.8	99.3	0.77	10.86	448.1	11.68	16.39	3.87	44.6	44.06	98.37	13.24	55.84	11.23	1.85	9.66	1.43	8.24	1.65	4.73	4.47	0.68	169.7	7.4	1.29	12.71
EMPA	CN53	Las Chilcas	125-64 Ma	332694	6382660	65.56	0.86	15.26	7.09	0.05	1.24	0.96	5.68	2.77	0.55	2.39	1.64	9.46	1.54	198	126	7.87	842.5	21.8	99.3	0.77	10.86	448.1	11.68	16.39	3.87	44.6	44.06	98.37	13.24	55.84	11.23	1.85	9.66	1.43	8.24	1.65	4.73	4.47	0.68	169.7	7.4	1.29	12.71
EMPA	CN53	Las Chilcas	125-64 Ma	332694	6382660	65.56	0.86	15.26	7.09	0.05	1.24	0.96	5.68	2.77	0.55	2.39	1.64	9.46	1.54	198	126	7.87	842.5	21.8	99.3	0.77	10.86	448.1	11.68	16.39	3.87	44.6	44.06	98.37	13.24	55.84	11.23	1.85	9.66	1.43	8.24	1.65	4.73	4.47	0.68	169.7	7.4	1.29	12.71
EMPA	CN53	Las Chilcas	125-64 Ma	332694	6382660	65.56	0.86	15.26	7.09	0.05	1.24	0.96	5.68	2.77	0.55	2.39	1.64	9.46	1.54	198	126	7.87	842.5	21.8	99.3	0.77	10.86	448.1	11.68	16.39	3.87	44.6	44.06	98.37	13.24	55.84	11.23	1.85	9.66	1.43	8.24	1.65	4.73	4.47	0.68	169.7	7.4	1.29	12.71
EMPA	CN53	Las Chilcas	125-64 Ma	332694	6382660	65.56	0.86	15.26	7.09	0.05	1.24	0.96	5.68	2.77	0.55	2.39	1.64	9.46	1.54	198	126	7.87	842.5	21.8	99.3	0.77	10.86	448.1	11.68	16.39	3.87	44.6	44.06	98.37	13.24	55.84	11.23	1.85	9.66	1.43	8.24	1.65	4.73	4.47	0.68	169.7	7.4	1.29	12.71
EMPA	CN53	Las Chilcas	125-64 Ma	332694	6382660	65.56	0.86	15.26	7.09	0.05	1.24	0.96	5.68	2.77	0.55	2.39	1.64	9.46	1.54	198	126	7.87	842.5	21.8	99.3	0.77	10.86	448.1	11.68	16.39	3.87	44.6	44.06	98.37	13.24	55.84	11.23	1.85	9.66	1.43	8.24	1.65	4.73	4.47	0.68	169.7	7.4	1.29	12.71
EMPA	CN53	Las Chilcas	125-64 Ma	332694	6382660	65.56	0.86	15.26	7.09	0.05	1.24	0.96	5.68	2.77	0.55	2.39	1.64	9.46	1.54	198	126	7.87	842.5	21.8	99.3	0.77	10.86	448.1	11.68	16.39	3.87	44.6	44.06	98.37	13.24	55.84	11.23	1.85	9.66	1.43	8.24	1.65	4.73	4.47	0.68	169.7	7.4	1.29	12.71
EMPA	CN53	Las Chilcas	125-64 Ma	332694	6382660	65.56	0.86	15.26	7.09	0.05	1.24	0.96	5.68	2.77	0.55	2.39	1.64	9.46	1.54	198	126	7.87	842.5	21.8	99.3	0.77	10.86	448.1	11.68	16.39	3.87	44.6	44.06	98.37	13.24	55.84	11.23	1.85	9.66	1.43	8.24	1.65	4.73	4.47	0.68	169.7	7.4	1.29	12.71
EMPA	CN53	Las Chilcas	125-64 Ma	332694	6382660	65.56	0.86	15.26	7.09	0.05	1.24	0.96	5.68	2.77	0.55	2.39	1.64	9.46	1.54	198	126	7.87	842.5	21.8	99.3	0.77	10.86	448.1	11.68	16.39	3.87	44.6	44.06	98.37	13.24	55.84	11.23	1.85	9.66	1.43	8.24	1.65	4.73	4.47	0.68	169.7	7.4	1.29	12.71
EMPA	CN53	Las Chilcas	125-64 Ma	332694	6382660	65.56	0.86	15.26	7.09	0.05	1.24	0.96	5.68	2.77	0.55	2.39	1.64	9.46	1.54	198	126	7.87	842.5	21.8	99.3	0.77	10.86	448.1	11.68	16.39	3.87	44.6	44.06	98.37	13.24	55.84	11.23	1.85	9.66	1.43	8.24	1.65	4.73	4.47	0.68	169.7	7.4	1.29	12.71
EMPA	CN53	Las Chilcas	125-64 Ma	332694	6382660	65.56	0.86	15.26	7.09	0.05	1.24	0.96	5.68	2.77	0.55	2.39	1.64	9.46	1.54	198	126	7.87	842.5	21.8	99.3	0.77	10.86	448.1	11.68	16.39	3.87	44.6	44.06	98.37	13.24	55.84	11.23	1.85	9.66	1.43	8.24	1.65	4.73	4.47	0.68	169.7	7.4	1.29	12.71
EMPA	CN53	Las Chilcas	125-64 Ma	332694	6382660	65.56	0.86	15.26	7.09	0.05	1.24	0.96	5.68	2.77	0.55	2.39	1.64	9.46	1.54	198	126	7.87	842.5	21.8	99.3	0.77	10.86	448.1	11.68	16.39	3.87	44.6	44.06	98.37	13.24	55.84	11.23	1.85	9.66	1.43	8.24	1.65	4.73	4.47	0.68	169.7	7.4	1.29	12.71
EMPA	CN53	Las Chilcas	125-64 Ma	332694	6382660	65.56	0.86	15.26	7.09	0.05	1.24	0.96	5.68	2.77	0.55	2.39	1.64	9.46	1.54	198	126	7.87	842.5	21.8	99.3	0.77	10.86	448.1	11.68	16.39	3.87	44.6	44.06	98.37	13.24	55.84	11.23	1.85	9.66	1.43	8.24	1.65	4.73	4.47	0.68	169.7	7.4	1.29	12.71
EMPA	CN53	Las Chilcas	125-64 Ma	332694	6382660	65.56	0.86	15.26	7.09	0.05	1.24	0.96	5.68	2.77	0.55	2.39	1.64	9.46	1.54	198	126	7.87	842.5	21.8	99.3	0.77	10.86	448.1	11.68	16.39	3.87	44.6	44.06	98.37	13.24	55.84	11.23	1.85	9.66	1.43	8.24	1.65	4.73	4.47	0.68	169.7	7.4	1.29	12.71
EMPA	CN53	Las Chilcas	125-64 Ma	332694	6382660	65.56	0.86	15.26	7.09	0.05	1.24	0.96	5.68	2.77	0.55	2.39	1.64	9.46	1.54	198	126	7.87	842.5	21.8	99.3	0.77	10.86	448.1	11.68	16.39	3.87	44.6	44.06	98.37	13.24	55.84	11.23	1.85	9.66	1.43	8.24	1.65	4.73	4.47	0.68	169.7	7.4	1.29	12.71
EMPA	CN53	Las Chilcas	125-64 Ma	332694	6382660	65.56	0.86	15.26	7.09	0.05	1.24	0.96	5.68	2.77	0.55	2.39	1.64	9.46	1.54	198	126	7.87	842.5	21.8	99.3	0.77	10.86	448.1	11.68	16.39	3.87	44.6	44.06	98.37	13.24	55.84	11.23	1.85	9.66	1.43	8.24	1.65	4.73	4.47	0.68	169.7	7.4	1.29	12.71
EMPA	CN53	Las Chilcas	125-64 Ma	332694	6382660	65.56	0.86	15.26	7.09	0.05	1.24	0.96	5.68	2.77	0.55	2.39	1.64	9.46	1.54	198	126	7.87	842.5	21.8	99.3	0.77	10.86	448.1	11.68	16.39	3.87	44.6	44.06	98.37	13.24	55.84	11.23	1.85	9.66	1.43	8.24	1.65	4.73	4.47	0.68	169.7	7.4	1.29	12.71
EMPA	CN53	Las Chilcas	125-64 Ma	332694	6382660	65.56	0.86	15.26	7.09	0.05	1.24	0.96	5.68	2.77	0.55	2.39	1.64	9.46	1.54	198	126	7.87	842.5	21.8	99.3	0.77	10.86	448.1	11.68	16.39	3.87	44.6	44.06	98.37	13.24	55.84	11.23	1.85	9.66	1.43	8.24	1.65	4.73	4.47	0.68	169.7	7.4	1.29	12.71
EMPA	CN53	Las Chilcas	125-64 Ma	332694	6382660	65.56	0.86	15.26	7.09	0.05	1.24	0.96	5.68	2.77	0.55	2.39	1.64	9.46	1.54	198	126	7.87	842.5	21.8	99.3	0.77	10.86	448.1	11.68	16.39	3.87	44.6	44.06	98.37	13.24	55.84	11.23	1.85	9.66	1.43	8.24	1.65	4.73	4.47	0.68	169.7	7.4	1.29	12.71
EMPA	CN53	Las Chilcas	125-64 Ma	332694	6382660	65.56	0.86	15.26	7.09	0.05	1.24	0.96	5.68	2.77	0.55	2.39	1.64	9.46	1.54	198	126	7.87	842.5	21.8	99.3	0.77	10.86	448.1	11.68	16.39	3.87	44.6	44.06	98.37	13.24	55.84	11.23	1.85	9.66	1.43	8.24	1.65	4.73	4.47	0.68	169.7	7.4	1.29	12.71
EMPA	CN53	Las Chilcas	125-64 Ma	332694	6382660	65.56	0.86	15.26	7.09	0.05	1.24	0.96	5.68	2.77	0.55	2.39	1.64	9.46	1.54	198	126	7.87	842.5	21.8	99.3	0.77	10.86	448.1	11.68	16.39	3.87	44.6	44.06	98.37	13.24	55.84	11.23	1.85	9.66	1.43	8.24	1.65	4.73	4.47	0.68	169.7	7.4	1.29	12.71
EMPA	CN53	Las Chilcas	125-64 Ma	332694	6382660	65.56	0.86	15.26	7.09	0.05	1.24	0.96	5.68	2.77	0.55	2.39	1.64	9.46	1.54	198	126	7.87	842.5	21.8	99.3	0.77	10.86	448.1	11.68	16.39	3.87	44.6	44.06	98.37	13.24	55.84	11.23	1.85	9.66	1.43	8.24	1.65	4.73	4.47	0.68	169.7	7.4	1.29	12.71
EMPA	CN53	Las Chilcas	125-64 Ma	332694	6382660	65.56	0.86	15.26	7.09	0.05	1.24	0.96	5.68	2.77	0.55	2.39	1.64	9.46	1.54	198	126	7.87	842.5	21.8	99.3	0.77	10.86	448.1	11.68	16.39	3.87	44.6	44.06	98.37	13.24	55.84	11.23	1.85	9.66	1.43	8.24	1.65	4.73	4.47	0.68	169.7	7.4	1.29	12.71
EMPA	CN53	Las Chilcas	125-64 Ma	332694	6382660	65.56	0.86	15.26	7.09	0.05	1.24	0.96	5.68	2.77	0.55	2.39	1.64	9.46	1.54	198	126	7.87	842.5	21.8	99.3	0.77	10.86	448.1	11.68	16.39	3.87	44.6	44.06	98.37	13.24	55.84	11.23	1.85	9.66	1.43	8.24	1.65	4.73	4.47	0.68	169.7	7.4	1.29	12.71
EMPA	CN53	Las Chilcas	125-64 Ma	332694	6382660	65.56	0.86	15.26	7.09	0.05	1.24	0.96	5.68	2.77	0.55	2.39	1.64	9.46	1.54	198	126	7.87	842.5	21.8	99.3	0.77	10.86	448.1	11.68	16.39	3.87	44.6	44.06	98.37	13.24	55.84	11.23	1.85	9.66	1.43	8.24	1.65	4.73	4.47	0.68	169.7	7.4	1.29	12.71
EMPA	CN53	Las Chilcas	125-64 Ma	332694	6382660	65.56	0.86	15.26	7.09	0.05	1.24	0.96	5.68	2.77	0.55	2.39	1.64	9.46	1.54	198	126	7.87	842.5	21.8	99.3	0.77	10.86	448.1	11.68	16.39	3.87	44.6	44.06	98.37	13.24	55.84	11.23	1.85	9.66	1.43	8.24	1.65	4.73	4.47	0.68	169.7	7.4	1.29	12.71
EMPA	CN53	Las Chilcas	125-64 Ma	332694	6382660	65.56	0.86	15.26	7.09	0.05	1.24	0.96	5.68	2.77	0.55	2.39	1.64	9.46	1.54	198	126	7.87	842.5	21.8	99.3	0.77	10.86	448.1	11.68	16.39	3.87	44.6	44.06	98.37	13.24	55.84	11.23	1.85	9.66	1.43	8.24	1.65	4.73	4.47	0.68	169.7	7.4	1.29	12.71
EMPA	CN53	Las Chilcas	125-64 Ma	332694	6382660	65.56	0.86	15.26	7.09	0.05	1.24	0.96	5.68	2.77	0.55	2.39	1.64	9.46	1.54	198	126	7.87	842.5	21.8	99.3	0.77	10.86	448.1	11.68	16.39	3.87	44.6	44.06	98.37	13.24	55.84	11.23	1.85	9.66	1.43	8.24	1.65	4.73	4.47	0.68	169.7	7.4	1.29	12.71
EMPA	CN53	Las Chilcas	125-64 Ma	332694	6382660	65.56	0.86	15.26	7.09	0.05	1.24	0.96	5.68	2.77	0.55	2.39	1.64	9.46	1.54	198	126	7.87	842.5	21.8	99.3	0.77	10.86	448.1	11.68	16.39	3.87	44.6	44.06	98.37	13.24	55.84	11.23	1.85	9.66	1.43	8.24	1.65	4.73	4.47	0.68	169.7	7.4	1.29	12.71
EMPA	CN53	Las Chilcas	125-64 Ma	332694	6382660	65.56	0.86	15.26	7.09	0.05	1.24	0.96	5.68	2.77	0.55	2.39	1.64	9.46	1.54	198	126	7.87	842.5	21.8	99.3	0.77	10.86	448.1	11.68	16.39	3.87	44.6	44.06	98.37	13.24	55.84	11.23	1.85	9.66	1.43	8.24	1.65	4.73	4.47	0.68	169.7	7.4	1.29	12.71
EMPA	CN53	Las Chilcas	125-64 Ma	332694	6382660	65.56	0.86	15.26	7.09	0.05	1.24	0.96	5.68	2.77	0.55	2.39	1.64	9.46	1.54	198	126	7.87	842.5	21.8	99.3	0.77	10.86	448.1	11.68	16.39	3.87	44.6	44.06	98.37	13.24	55.84	11.23	1.85	9.66	1.43	8.24	1.65	4.73	4.47	0.68	169.7	7.4	1.29	12.71
EMPA	CN53	Las Chilcas	125-64 Ma	332694	6382660	65.56	0.86	15.26	7.09	0.05	1.24	0.96	5.68	2.77	0.55	2.39	1.64	9.46	1.54	198	126	7.87	842.5	21.8	99.3	0.77	10.86	448.1	11.68	16.39	3.87	44.6	44.06	98.37	13.24	55.84	11.23	1.85	9.66	1.43	8.24	1.65	4.73	4.47	0.68	169.7	7.4	1.29	12.71
EMPA	CN53	Las Chilcas	125-64 Ma	332694	6382660	65.56	0.86	15.26	7.09	0.05	1.24	0.96	5.68	2.77	0.55	2.39	1.64	9.46	1.54	198	126	7.87	842.5	21.8	99.3	0.77	10.86	448.1	11.68	16.39	3.87	44.6	44.06	98.37	13.24	55.84	11.23	1.85	9.66	1.43	8.24	1.65	4.73	4.47	0.68	169.7	7.4	1.29	12.71
EMPA	CN53	Las Chilcas	125-64 Ma	332694	6382660	65.56	0.86	15.26	7.09	0.05	1.24	0.96	5.68	2.77	0.55	2.39	1.64	9.46	1.54	198	126	7.87	842.5	21.8	99.3	0.77	10.86	448.1	11.68	16.39	3.87	44.6	44.06	98.37	13.24	55.84	11.23	1.85	9.66	1.43	8.24	1.65	4.73	4.47	0.68	169.7	7.4	1.29	12.71
EMPA	CN53	Las Chilcas	125-64 Ma	332694	6382660	65.56	0.86	15.26	7.09	0.05	1.24	0.96	5.68	2.77	0.55	2.39	1.64	9.46	1.54	198	126	7.87	842.5	21.8	99.3	0.77	10.86	448.1	11.68	16.39	3.87	44.6	44.06	98.37	13.24	55.84	11.23	1.85	9.66	1.43	8.24	1.65	4.73	4.47	0.68	169.7	7.4	1.29	12.71
EMPA	CN53	Las Chilcas	125-64 Ma	332694	6382660	65.56	0.86	15.26	7.09	0.05	1.24	0.96	5.68	2.77	0.55	2.39	1.64	9.46	1.54	198	126	7.87	842.5	21.8	99.3	0.77	10.86	448.1	11.68	16.39	3.87	44.6	44.06	98.37	13.24	55.84	11.23	1.85	9.66	1.43	8.24	1.65	4.73	4.47	0.68	169.7	7.4	1.29	12.71
EMPA	CN53	Las Chilcas	125-64 Ma	332694	6382660	65.56	0.86	15.26	7.09	0.05	1.24	0.96	5.68	2.77	0.55	2.39	1.64	9.46	1.54	198	126	7.87	842.5	21.8	99.3	0.77	10.86	448.1	11.68	16.39	3.87	44.6	44.06	98.37	13.24	55.84	11.23	1.85	9.66	1.43	8.24	1.65	4.73	4.47	0.68	169.7	7.4	1.29	12.71
EMPA	CN53	Las Chilcas	125-64 Ma	332694	6382660	65.56	0.86	15.26	7.09	0.05	1.24	0.96	5.68	2.77	0.55	2.39	1.64	9.46	1.54	198	126	7.87	842.5	21.8	99.3	0.77	10.86	448.1	11.68	16.39	3.87	44.6	44.06	98.37	13.24	55.84	11.23	1.85	9.66	1.43	8.24	1.65	4.73	4.47	0.68	169.7	7.4	1.29	12.71
EMPA	CN53	Las Chilcas	125-64 Ma	332694	6382660	65.56	0.86	15.26	7.09	0.05	1.24	0.96	5.68	2.77	0.55	2.39	1.64	9.46	1.54	198	126	7.87	842.5	21.8	99.3	0.77	10.86	448.1	11.68	16.39	3.87	44.6	44.06	98.37	13.24	55.84	11.23	1.85	9.66	1.43	8.24	1.65	4.73	4.47	0.68	169.7	7.4	1.29	12.71
EMPA	CN53	Las Chilcas	125-64 Ma	332694	6382660	65.56	0.86	15.26	7.09	0.05	1.24	0.96	5.68	2.77	0.55	2.39	1.64	9.46	1.54	198	126	7.87	842.5	21.8	99.3	0.77	10.86	448.1	11.68	16.39	3.87	44.6	44.06	98.37	13.24	55.84	11.23	1.85	9.66	1.43	8.24	1.65	4.73	4.47	0.68	169.7	7.4	1.29	12.71
EMPA	CN53	Las Chilcas	125-64 Ma	332694	6382660	65.56	0.86	15.26	7.09	0.05	1.24	0.96	5.68	2.77	0.55	2.39	1.64	9.46	1.54	198	126	7.87	842.5	21.8	99.3	0.77	10.86	448.1	11.68	16.39	3.87	44.6	44.06	98.37	13.24	55.84	11.23	1.85	9.66	1.43	8.24	1.65	4.73	4.47	0.68	169.7	7.4	1.29	12.71
EMPA	CN53	Las Chilcas	125-64 Ma	332694	6382660	65.56	0.86	15.26	7.09	0.05	1.24	0.96	5.68	2.77	0.55	2.39	1.64	9.46	1.54	198	126	7.87	842.5	21.8	99.3	0.77	10.86	448.1	11.68	16.39	3.87	44.6	44.06	98.37	13.24	55.84	11.23	1.85	9.66	1.43	8.24	1.65	4.73	4.47	0.68	169.7	7.4	1.29	12.71
EMPA	CN53	Las Chilcas	125-64 Ma	332694	6382660	65.56	0.86	15.26	7.09	0.05	1.24	0.96	5.68	2.77	0.55	2.39	1.64	9.46	1.54	198	126	7.87	842.5	21.8	99.3	0.77	10.86	448.1	11.68	16.39	3.87	44.6	44.06	98.37	13.24	55.84	11.23	1.85	9.66	1.43	8.24	1.65	4.73	4.47	0.68	169.7	7.4	1.29	12.71
EMPA	CN53	Las Chilcas	125-64 Ma	332694	6382660	65.56	0.86	15.26	7.09	0.05	1.24	0.96	5.68	2.77	0.55	2.39	1.64	9.46	1.54	198	126	7.87	842.5	21.8	99.3	0.77	10.86	448.1	11.68	16.39	3.87	44.6	44.06	98.37	13.24	55.84	11.23	1.85	9.66	1.43	8.24	1.65	4.73	4.47	0.68	169.7	7.4	1.29	12.71
EMPA	CN53	Las Chilcas	125-64 Ma	332694	6382660	65.56	0.86	15.26	7.09	0.05	1.24	0.96	5.68	2.77	0.55	2.39	1.64	9.46	1.54	198	126	7.87	842.5	21.8	99.3	0.77	10.86	448.1	11.68	16.39	3.87	44.6	44.06	98.37	13.24	55.84	11.23	1.85	9.66	1.43	8.24	1.65	4.73	4.47	0.68	169.7	7.4	1.29	12.71
EMPA	CN53	Las Chilcas	125-64 Ma	332694	6382660	65.56	0.86	15.26	7.09	0.05	1.24	0.96	5.68	2.77	0.55	2.39	1.64	9.46	1.54	198	126	7.87	842.5	21.8	99.3	0.77	10.86	448.1	11.68	16.39	3.87	44.6	44.06	98.37	13.24	55.84	11.23	1.85	9.66	1.43	8.24	1.65	4.73	4.47	0.68	169.7	7.4	1.29	12.71
EMPA	CN53	Las Chilcas	125-64 Ma	332694	6382660	65.56	0.86	15.26	7.09	0.05	1.24	0.96	5.68	2.77	0.55	2.39	1.64	9.46	1.54	198	126	7.87	842.5	21.8	99.3	0.77	10.86	448.1	11.68	16.39	3.87	44.6	44.06	98.37	13.24	55.84	11.23	1.85	9.66	1.43	8.24	1.65	4.73	4.47	0.68	169.7	7.4	1.29	12.71
CN82_SAL_05_01	CN82	Salamanca	30.1-11.4 Ma	329528	6440846	70.88	0.35	14.68	3.17	0.06	0.54	1.32	5.43	3.49	0.09	1.67	3.76	4.86	2.24	165	496	1.89	609.9	9.6	60.7	0.73	9.15	378.4	11.88	24.71	6.66	29	24	54.92	7.2	27.76	5.74	0.6	4.98	0.79	4.91	1.06	3.38	3.66	0.59	32.2	70.1	2.83	7.32
CN82_SAL_05_02	CN82	Salamanca	30.1-11.4 Ma	329528	6440846	70.88	0.35	14.68	3.17	0.06	0.54	1.32	5.43	3.49	0.09	1.67	3.76	4.86	2.24	165	496	1.89	609.9	9.6	60.7	0.73	9.15	378.4	11.88	24.71	6.66	29	24	54.92	7.2	27.76	5.74	0.6	4.98	0.79	4.91	1.06	3.38	3.66	0.59	32.2	70.1	2.83	7.32
CN82_SAL_05_03	CN82	Salamanca	30.1-11.4 Ma	329528	6440846	70.88	0.35	14.68	3.17	0.06	0.54	1.32	5.43	3.49	0.09	1.67	3.76	4.86	2.24	165	496	1.89	609.9	9.6	60.7	0.73	9.15	378.4	11.88	24.71	6.66	29	24	54.92	7.2	27.76	5.74	0.6	4.98	0.79	4.91	1.06	3.38	3.66	0.59	32.2	70.1	2.83	7.32
CN82_SAL_09_01	CN82	Salamanca	30.1-11.4 Ma	329528	6440846	70.88	0.35	14.68	3.17	0.06	0.54	1.32	5.43	3.49	0.09	1.67	3.76	4.86	2.24	165	496	1.89	609.9	9.6	60.7	0.73	9.15	378.4	11.88	24.71	6.66	29	24	54.92	7.2	27.76	5.74	0.6	4.98	0.79	4.91	1.06	3.38	3.66	0.59	32.2	70.1	2.83	7.32
CN82_SAL_09_02	CN82	Salamanca	30.1-11.4 Ma	329528	6440846	70.88	0.35	14.68	3.17	0.06	0.54	1.32	5.43	3.49	0.09	1.67	3.76	4.86	2.24	165	496	1.89	609.9	9.6	60.7	0.73	9.15	378.4	11.88	24.71	6.66	29	24	54.92	7.2	27.76	5.74	0.6	4.98	0.79	4.91	1.06	3.38	3.66	0.59	32.2	70.1	2.83	7.32
EMPA	CN82	Salamanca	30.1-11.4 Ma	329528	6440846	70.88	0.35	14.68	3.17	0.06	0.54	1.32	5.43	3.49	0.09	1.67	3.76	4.86	2.24	165	496	1.89	609.9	9.6	60.7	0.73	9.15	378.4	11.88	24.71	6.66	29	24	54.92	7.2	27.76	5.74	0.6	4.98	0.79	4.91	1.06	3.38	3.66	0.59	32.2	70.1	2.83	7.32
EMPA	CN82	Salamanca	30.1-11.4 Ma	329528	6440846	70.88	0.35	14.68	3.17	0.06	0.54	1.32	5.43	3.49	0.09	1.67	3.76	4.86	2.24	165	496	1.89	609.9	9.6	60.7	0.73	9.15	378.4	11.88	24.71	6.66	29	24	54.92	7.2	27.76	5.74	0.6	4.98	0.79	4.91	1.06	3.38	3.66	0.59	32.2	70.1	2.83	7.32
EMPA	CN82	Salamanca	30.1-11.4 Ma	329528	6440846	70.88	0.35	14.68	3.17	0.06	0.54	1.32	5.43	3.49	0.09	1.67	3.76	4.86	2.24	165	496	1.89	609.9	9.6	60.7	0.73	9.15	378.4	11.88	24.71	6.66	29	24	54.92	7.2	27.76	5.74	0.6	4.98	0.79	4.91	1.06	3.38	3.66	0.59	32.2	70.1	2.83	7.32
EMPA	CN82	Salamanca	30.1-11.4 Ma	329528	6440846	70.88	0.35	14.68	3.17	0.06	0.54	1.32	5.43	3.49	0.09	1.67	3.76	4.86	2.24	165	496	1.89	609.9	9.6	60.7	0.73	9.15	378.4	11.88	24.71	6.66	29	24	54.92	7.2	27.76	5.74	0.6	4.98	0.79	4.91	1.06	3.38	3.66	0.59	32.2	70.1	2.83	7.32
EMPA	CN82	Salamanca	30.1-11.4 Ma	329528	6440846	70.88	0.35	14.68	3.17	0.06	0.54	1.32	5.43	3.49	0.09	1.67	3.76	4.86	2.24	165	496	1.89	609.9	9.6	60.7	0.73	9.15	378.4	11.88	24.71	6.66	29	24	54.92	7.2	27.76	5.74	0.6	4.98	0.79	4.91	1.06	3.38	3.66	0.59	32.2	70.1	2.83	7.32
EMPA	CN82	Salamanca	30.1-11.4 Ma	329528	6440846	70.88	0.35	14.68	3.17	0.06	0.54	1.32	5.43	3.49	0.09	1.67	3.76	4.86	2.24	165	496	1.89	609.9	9.6	60.7	0.73	9.15	378.4	11.88	24.71	6.66	29	24	54.92	7.2	27.76	5.74	0.6	4.98	0.79	4.91	1.06	3.38	3.66	0.59	32.2	70.1	2.83	7.32
EMPA	CN82	Salamanca	30.1-11.4 Ma	329528	6440846	70.88	0.35	14.68	3.17	0.06	0.54	1.32	5.43	3.49	0.09	1.67	3.76	4.86	2.24	165	496	1.89	609.9	9.6	60.7	0.73	9.15	378.4	11.88	24.71	6.66	29	24	54.92	7.2	27.76	5.74	0.6	4.98	0.79	4.91	1.06	3.38	3.66	0.59	32.2	70.1	2.83	7.32
EMPA	CN82	Salamanca	30.1-11.4 Ma	329528	6440846	70.88	0.35	14.68	3.17	0.06	0.54	1.32	5.43	3.49	0.09	1.67	3.76	4.86	2.24	165	496	1.89	609.9	9.6	60.7	0.73	9.15	378.4	11.88	24.71	6.66	29	24	54.92	7.2	27.76	5.74	0.6	4.98	0.79	4.91	1.06	3.38	3.66	0.59	32.2	70.1	2.83	7.32
EMPA	CN82	Salamanca	30.1-11.4 Ma	329528	6440846	70.88	0.35	14.68	3.17	0.06	0.54	1.32	5.43	3.49	0.09	1.67	3.76	4.86	2.24	165	496	1.89	609.9	9.6	60.7	0.73	9.15	378.4	11.88	24.71	6.66	29	24	54.92	7.2	27.76	5.74	0.6	4.98	0.79	4.91	1.06	3.38	3.66	0.59	32.2	70.1	2.83	7.32
EMPA	CN82	Salamanca	30.1-11.4 Ma	329528	6440846	70.88	0.35	14.68	3.17	0.06	0.54	1.32	5.43	3.49	0.09	1.67	3.76	4.86	2.24	165	496	1.89	609.9	9.6	60.7	0.73	9.15	378.4	11.88	24.71	6.66	29	24	54.92	7.2	27.76	5.74	0.6	4.98	0.79	4.91	1.06	3.38	3.66	0.59	32.2	70.1	2.83	7.32
EMPA	CN82	Salamanca	30.1-11.4 Ma	329528	6440846	70.88	0.35	14.68	3.17	0.06	0.54	1.32	5.43	3.49	0.09	1.67	3.76	4.86	2.24	165	496	1.89	609.9	9.6	60.7	0.73	9.15	378.4	11.88	24.71	6.66	29	24	54.92	7.2	27.76	5.74	0.6	4.98	0.79	4.91	1.06	3.38	3.66	0.59	32.2	70.1	2.83	7.32
EMPA	CN82	Salamanca	30.1-11.4 Ma	329528	6440846	70.88	0.35	14.68	3.17	0.06	0.54	1.32	5.43	3.49	0.09	1.67	3.76	4.86	2.24	165	496	1.89	609.9	9.6	60.7	0.73	9.15	378.4	11.88	24.71	6.66	29	24	54.92	7.2	27.76	5.74	0.6	4.98	0.79	4.91	1.06	3.38	3.66	0.59	32.2	70.1	2.83	7.32
EMPA	CN82	Salamanca	30.1-11.4 Ma	329528	6440846	70.88	0.35	14.68	3.17	0.06	0.54	1.32	5.43	3.49	0.09	1.67	3.76	4.86	2.24	165	496	1.89	609.9	9.6	60.7	0.73	9.15	378.4	11.88	24.71	6.66	29	24	54.92	7.2	27.76	5.74	0.6	4.98	0.79	4.91	1.06	3.38	3.66	0.59	32.2	70.1	2.83	7.32
EMPA	CN82	Salamanca	30.1-11.4 Ma	329528	6440846	70.88	0.35	14.68	3.17	0.06	0.54	1.32	5.43	3.49	0.09	1.67	3.76	4.86	2.24	165	496	1.89	609.9	9.6	60.7	0.73	9.15	378.4	11.88	24.71	6.66	29	24	54.92	7.2	27.76	5.74	0.6	4.98	0.79	4.91	1.06	3.38	3.66	0.59	32.2	70.1	2.83	7.32
EMPA	CN82	Salamanca	30.1-11.4 Ma	329528	6440846	70.88	0.35	14.68	3.17	0.06	0.54	1.32	5.43	3.49	0.09	1.67	3.76	4.86	2.24	165	496	1.89	609.9	9.6	60.7	0.73	9.15	378.4	11.88	24.71	6.66	29	24	54.92	7.2	27.76	5.74	0.6	4.98	0.79	4.91	1.06	3.38	3.66	0.59	32.2	70.1	2.83	7.32
CN82_TS_03_01	CN82	Salamanca	30.1-11.4 Ma	329528	6440846	70.88	0.35	14.68	3.17	0.06	0.54	1.32	5.43	3.49	0.09	1.67	3.76	4.86	2.24	165	496	1.89	609.9	9.6	60.7	0.73	9.15	378.4	11.88	24.71	6.66	29	24	54.92	7.2	27.76	5.74	0.6	4.98	0.79	4.91	1.06	3.38	3.66	0.59	32.2	70.1	2.83	7.32
CN82_TS_04_01	CN82	Salamanca	30.1-11.4 Ma	329528	6440846	70.88	0.35	14.68	3.17	0.06	0.54	1.32	5.43	3.49	0.09	1.67	3.76	4.86	2.24	165	496	1.89	609.9	9.6	60.7	0.73	9.15	378.4	11.88	24.71	6.66	29	24	54.92	7.2	27.76	5.74	0.6	4.98	0.79	4.91	1.06	3.38	3.66	0.59	32.2	70.1	2.83	7.32
CN82_TS_08_01	CN82	Salamanca	30.1-11.4 Ma	329528	6440846	70.88	0.35	14.68	3.17	0.06	0.54	1.32	5.43	3.49	0.09	1.67	3.76	4.86	2.24	165	496	1.89	609.9	9.6	60.7	0.73	9.15	378.4	11.88	24.71	6.66	29	24	54.92	7.2	27.76	5.74	0.6	4.98	0.79	4.91	1.06	3.38	3.66	0.59	32.2	70.1	2.83	7.32
CN82_TS_09_01	CN82	Salamanca	30.1-11.4 Ma	329528	6440846	70.88	0.35	14.68	3.17	0.06	0.54	1.32	5.43	3.49	0.09	1.67	3.76	4.86	2.24	165	496	1.89	609.9	9.6	60.7	0.73	9.15	378.4	11.88	24.71	6.66	29	24	54.92	7.2	27.76	5.74	0.6	4.98	0.79	4.91	1.06	3.38	3.66	0.59	32.2	70.1	2.83	7.32
CN82_TS_12_02	CN82	Salamanca	30.1-11.4 Ma	329528	6440846	70.88	0.35	14.68	3.17	0.06	0.54	1.32	5.43	3.49	0.09	1.67	3.76	4.86	2.24	165	496	1.89	609.9	9.6	60.7	0.73	9.15	378.4	11.88	24.71	6.66	29	24	54.92	7.2	27.76	5.74	0.6	4.98	0.79	4.91	1.06	3.38	3.66	0.59	32.2	70.1	2.83	7.32
CN82_TS_13_01	CN82	Salamanca	30.1-11.4 Ma	329528	6440846	70.88	0.35	14.68	3.17	0.06	0.54	1.32	5.43	3.49	0.09	1.67	3.76	4.86	2.24	165	496	1.89	609.9	9.6	60.7	0.73	9.15	378.4	11.88	24.71	6.66	29	24	54.92	7.2	27.76	5.74	0.6	4.98	0.79	4.91	1.06	3.38	3.66	0.59	32.2	70.1	2.83	7.32
CN82_TS_13_02	CN82	Salamanca	30.1-11.4 Ma	329528	6440846	70.88	0.35	14.68	3.17	0.06	0.54	1.32	5.43	3.49	0.09	1.67	3.76	4.86	2.24	165	496	1.89	609.9	9.6	60.7	0.73	9.15	378.4	11.88	24.71	6.66	29	24	54.92	7.2	27.76	5.74	0.6	4.98	0.79	4.91	1.06	3.38	3.66	0.59	32.2	70.1	2.83	7.32
CN82_TS_13_04	CN82	Salamanca	30.1-11.4 Ma	329528	6440846	70.88	0.35	14.68	3.17	0.06	0.54	1.32	5.43	3.49	0.09	1.67	3.76	4.86	2.24	165	496	1.89	609.9	9.6	60.7	0.73	9.15	378.4	11.88	24.71	6.66	29	24	54.92	7.2	27.76	5.74	0.6	4.98	0.79	4.91	1.06	3.38	3.66	0.59	32.2	70.1	2.83	7.32
EMPA	CN82	Salamanca	30.1-11.4 Ma	329528	6440846	70.88	0.35	14.68	3.17	0.06	0.54	1.32	5.43	3.49	0.09	1.67	3.76	4.86	2.24	165	496	1.89	609.9	9.6	60.7	0.73	9.15	378.4	11.88	24.71	6.66	29	24	54.92	7.2	27.76	5.74	0.6	4.98	0.79	4.91	1.06	3.38	3.66	0.59	32.2	70.1	2.83	7.32
EMPA	CN82	Salamanca	30.1-11.4 Ma	329528	6440846	70.88	0.35	14.68	3.17	0.06	0.54	1.32	5.43	3.49	0.09	1.67	3.76	4.86	2.24	165	496	1.89	609.9	9.6	60.7	0.73	9.15	378.4	11.88	24.71	6.66	29	24	54.92	7.2	27.76	5.74	0.6	4.98	0.79	4.91	1.06	3.38	3.66	0.59	32.2	70.1	2.83	7.32
EMPA	CN82	Salamanca	30.1-11.4 Ma	329528	6440846	70.88	0.35	14.68	3.17	0.06	0.54	1.32	5.43	3.49	0.09	1.67	3.76	4.86	2.24	165	496	1.89	609.9	9.6	60.7	0.73	9.15	378.4	11.88	24.71	6.66	29	24	54.92	7.2	27.76	5.74	0.6	4.98	0.79	4.91	1.06	3.38	3.66	0.59	32.2	70.1	2.83	7.32
EMPA	CN82	Salamanca	30.1-11.4 Ma	329528	6440846	70.88	0.35	14.68	3.17	0.06	0.54	1.32	5.43	3.49	0.09	1.67	3.76	4.86	2.24	165	496	1.89	609.9	9.6	60.7	0.73	9.15	378.4	11.88	24.71	6.66	29	24	54.92	7.2	27.76	5.74	0.6	4.98	0.79	4.91	1.06	3.38	3.66	0.59	32.2	70.1	2.83	7.32
EMPA	CN82	Salamanca	30.1-11.4 Ma	329528	6440846	70.88	0.35	14.68	3.17	0.06	0.54	1.32	5.43	3.49	0.09	1.67	3.76	4.86	2.24	165	496	1.89	609.9	9.6	60.7	0.73	9.15	378.4	11.88	24.71	6.66	29	24	54.92	7.2	27.76	5.74	0.6	4.98	0.79	4.91	1.06	3.38	3.66	0.59	32.2	70.1	2.83	7.32
EMPA	CN82	Salamanca	30.1-11.4 Ma	329528	6440846	70.88	0.35	14.68	3.17	0.06	0.54	1.32	5.43	3.49	0.09	1.67	3.76	4.86	2.24	165	496	1.89	609.9	9.6	60.7	0.73	9.15	378.4	11.88	24.71	6.66	29	24	54.92	7.2	27.76	5.74	0.6	4.98	0.79	4.91	1.06	3.38	3.66	0.59	32.2	70.1	2.83	7.32
EMPA	CN82	Salamanca	30.1-11.4 Ma	329528	6440846	70.88	0.35	14.68	3.17	0.06	0.54	1.32	5.43	3.49	0.09	1.67	3.76	4.86	2.24	165	496	1.89	609.9	9.6	60.7	0.73	9.15	378.4	11.88	24.71	6.66	29	24	54.92	7.2	27.76	5.74	0.6	4.98	0.79	4.91	1.06	3.38	3.66	0.59	32.2	70.1	2.83	7.32
EMPA	CN82	Salamanca	30.1-11.4 Ma	329528	6440846	70.88	0.35	14.68	3.17	0.06	0.54	1.32	5.43	3.49	0.09	1.67	3.76	4.86	2.24	165	496	1.89	609.9	9.6	60.7	0.73	9.15	378.4	11.88	24.71	6.66	29	24	54.92	7.2	27.76	5.74	0.6	4.98	0.79	4.91	1.06	3.38	3.66	0.59	32.2	70.1	2.83	7.32
EMPA	CN82	Salamanca	30.1-11.4 Ma	329528	6440846	70.88	0.35	14.68	3.17	0.06	0.54	1.32	5.43	3.49	0.09	1.67	3.76	4.86	2.24	165	496	1.89	609.9	9.6	60.7	0.73	9.15	378.4	11.88	24.71	6.66	29	24	54.92	7.2	27.76	5.74	0.6	4.98	0.79	4.91	1.06	3.38	3.66	0.59	32.2	70.1	2.83	7.32
EMPA	CN82	Salamanca	30.1-11.4 Ma	329528	6440846	70.88	0.35	14.68	3.17	0.06	0.54	1.32	5.43	3.49	0.09	1.67	3.76	4.86	2.24	165	496	1.89	609.9	9.6	60.7	0.73	9.15	378.4	11.88	24.71	6.66	29	24	54.92	7.2	27.76	5.74	0.6	4.98	0.79	4.91	1.06	3.38	3.66	0.59	32.2	70.1	2.83	7.32
EMPA	CN82	Salamanca	30.1-11.4 Ma	329528	6440846	70.88	0.35	14.68	3.17	0.06	0.54	1.32	5.43	3.49	0.09	1.67	3.76	4.86	2.24	165	496	1.89	609.9	9.6	60.7	0.73	9.15	378.4	11.88	24.71	6.66	29	24	54.92	7.2	27.76	5.74	0.6	4.98	0.79	4.91	1.06	3.38	3.66	0.59	32.2	70.1	2.83	7.32
CV12-FAR_05_01	CV12	Farellones	22-16 Ma	375953	6284829	60.55	0.92	17.97	6.22	0.13	2	5.2	1.84	4.81	0.35	3.25	3	11.04	2.27	44	440	2.55	454.8	18.2	94.4	0.39	4.65	190.7	5.31	5.39	1.56	29.6	16.89	35.97	5.32	23.15	5.66	1.53	5.86	0.92	5.48	1.13	3.27	3.09	0.47	71	22.5	0.74	10.03
CV12-FAR_05_02	CV12	Farellones	22-16 Ma	375953	6284829	60.55	0.92	17.97	6.22	0.13	2	5.2	1.84	4.81	0.35	3.25	3	11.04	2.27	44	440	2.55	454.8	18.2	94.4	0.39	4.65	190.7	5.31	5.39	1.56	29.6	16.89	35.97	5.32	23.15	5.66	1.53	5.86	0.92	5.48	1.13	3.27	3.09	0.47	71	22.5	0.74	10.03
CV12-FAR_06_02	CV12	Farellones	22-16 Ma	375953	6284829	60.55	0.92	17.97	6.22	0.13	2	5.2	1.84	4.81	0.35	3.25	3	11.04	2.27	44	440	2.55	454.8	18.2	94.4	0.39	4.65	190.7	5.31	5.39	1.56	29.6	16.89	35.97	5.32	23.15	5.66	1.53	5.86	0.92	5.48	1.13	3.27	3.09	0.47	71	22.5	0.74	10.03
CV12-FAR_06_03	CV12	Farellones	22-16 Ma	375953	6284829	60.55	0.92	17.97	6.22	0.13	2	5.2	1.84	4.81	0.35	3.25	3	11.04	2.27	44	440	2.55	454.8	18.2	94.4	0.39	4.65	190.7	5.31	5.39	1.56	29.6	16.89	35.97	5.32	23.15	5.66	1.53	5.86	0.92	5.48	1.13	3.27	3.09	0.47	71	22.5	0.74	10.03
CV12-FAR_07_01	CV12	Farellones	22-16 Ma	375953	6284829	60.55	0.92	17.97	6.22	0.13	2	5.2	1.84	4.81	0.35	3.25	3	11.04	2.27	44	440	2.55	454.8	18.2	94.4	0.39	4.65	190.7	5.31	5.39	1.56	29.6	16.89	35.97	5.32	23.15	5.66	1.53	5.86	0.92	5.48	1.13	3.27	3.09	0.47	71	22.5	0.74	10.03
CV12-FAR_07_02	CV12	Farellones	22-16 Ma	375953	6284829	60.55	0.92	17.97	6.22	0.13	2	5.2	1.84	4.81	0.35	3.25	3	11.04	2.27	44	440	2.55	454.8	18.2	94.4	0.39	4.65	190.7	5.31	5.39	1.56	29.6	16.89	35.97	5.32	23.15	5.66	1.53	5.86	0.92	5.48	1.13	3.27	3.09	0.47	71	22.5	0.74	10.03
CV12-FAR_11_01	CV12	Farellones	22-16 Ma	375953	6284829	60.55	0.92	17.97	6.22	0.13	2	5.2	1.84	4.81	0.35	3.25	3	11.04	2.27	44	440	2.55	454.8	18.2	94.4	0.39	4.65	190.7	5.31	5.39	1.56	29.6	16.89	35.97	5.32	23.15	5.66	1.53	5.86	0.92	5.48	1.13	3.27	3.09	0.47	71	22.5	0.74	10.03
CV12-FAR_12_01	CV12	Farellones	22-16 Ma	375953	6284829	60.55	0.92	17.97	6.22	0.13	2	5.2	1.84	4.81	0.35	3.25	3	11.04	2.27	44	440	2.55	454.8	18.2	94.4	0.39	4.65	190.7	5.31	5.39	1.56	29.6	16.89	35.97	5.32	23.15	5.66	1.53	5.86	0.92	5.48	1.13	3.27	3.09	0.47	71	22.5	0.74	10.03
CV12-FAR_14_01	CV12	Farellones	22-16 Ma	375953	6284829	60.55	0.92	17.97	6.22	0.13	2	5.2	1.84	4.81	0.35	3.25	3	11.04	2.27	44	440	2.55	454.8	18.2	94.4	0.39	4.65	190.7	5.31	5.39	1.56	29.6	16.89	35.97	5.32	23.15	5.66	1.53	5.86	0.92	5.48	1.13	3.27	3.09	0.47	71	22.5	0.74	10.03
CV12-FAR_14_03	CV12	Farellones	22-16 Ma	375953	6284829	60.55	0.92	17.97	6.22	0.13	2	5.2	1.84	4.81	0.35	3.25	3	11.04	2.27	44	440	2.55	454.8	18.2	94.4	0.39	4.65	190.7	5.31	5.39	1.56	29.6	16.89	35.97	5.32	23.15	5.66	1.53	5.86	0.92	5.48	1.13	3.27	3.09	0.47	71	22.5	0.74	10.03
CV12-FAR_14_05	CV12	Farellones	22-16 Ma	375953	6284829	60.55	0.92	17.97	6.22	0.13	2	5.2	1.84	4.81	0.35	3.25	3	11.04	2.27	44	440	2.55	454.8	18.2	94.4	0.39	4.65	190.7	5.31	5.39	1.56	29.6	16.89	35.97	5.32	23.15	5.66	1.53	5.86	0.92	5.48	1.13	3.27	3.09	0.47	71	22.5	0.74	10.03
CV12-FAR_16_01	CV12	Farellones	22-16 Ma	375953	6284829	60.55	0.92	17.97	6.22	0.13	2	5.2	1.84	4.81	0.35	3.25	3	11.04	2.27	44	440	2.55	454.8	18.2	94.4	0.39	4.65	190.7	5.31	5.39	1.56	29.6	16.89	35.97	5.32	23.15	5.66	1.53	5.86	0.92	5.48	1.13	3.27	3.09	0.47	71	22.5	0.74	10.03
CV12-FAR_17_10	CV12	Farellones	22-16 Ma	375953	6284829	60.55	0.92	17.97	6.22	0.13	2	5.2	1.84	4.81	0.35	3.25	3	11.04	2.27	44	440	2.55	454.8	18.2	94.4	0.39	4.65	190.7	5.31	5.39	1.56	29.6	16.89	35.97	5.32	23.15	5.66	1.53	5.86	0.92	5.48	1.13	3.27	3.09	0.47	71	22.5	0.74	10.03
CV12-FAR_17_12	CV12	Farellones	22-16 Ma	375953	6284829	60.55	0.92	17.97	6.22	0.13	2	5.2	1.84	4.81	0.35	3.25	3	11.04	2.27	44	440	2.55	454.8	18.2	94.4	0.39	4.65	190.7	5.31	5.39	1.56	29.6	16.89	35.97	5.32	23.15	5.66	1.53	5.86	0.92	5.48	1.13	3.27	3.09	0.47	71	22.5	0.74	10.03
CV12-FAR_20_01	CV12	Farellones	22-16 Ma	375953	6284829	60.55	0.92	17.97	6.22	0.13	2	5.2	1.84	4.81	0.35	3.25	3	11.04	2.27	44	440	2.55	454.8	18.2	94.4	0.39	4.65	190.7	5.31	5.39	1.56	29.6	16.89	35.97	5.32	23.15	5.66	1.53	5.86	0.92	5.48	1.13	3.27	3.09	0.47	71	22.5	0.74	10.03
CV12-FAR_21_01	CV12	Farellones	22-16 Ma	375953	6284829	60.55	0.92	17.97	6.22	0.13	2	5.2	1.84	4.81	0.35	3.25	3	11.04	2.27	44	440	2.55	454.8	18.2	94.4	0.39	4.65	190.7	5.31	5.39	1.56	29.6	16.89	35.97	5.32	23.15	5.66	1.53	5.86	0.92	5.48	1.13	3.27	3.09	0.47	71	22.5	0.74	10.03
CV12-FAR_24_02	CV12	Farellones	22-16 Ma	375953	6284829	60.55	0.92	17.97	6.22	0.13	2	5.2	1.84	4.81	0.35	3.25	3	11.04	2.27	44	440	2.55	454.8	18.2	94.4	0.39	4.65	190.7	5.31	5.39	1.56	29.6	16.89	35.97	5.32	23.15	5.66	1.53	5.86	0.92	5.48	1.13	3.27	3.09	0.47	71	22.5	0.74	10.03
CV12-FAR_24_03	CV12	Farellones	22-16 Ma	375953	6284829	60.55	0.92	17.97	6.22	0.13	2	5.2	1.84	4.81	0.35	3.25	3	11.04	2.27	44	440	2.55	454.8	18.2	94.4	0.39	4.65	190.7	5.31	5.39	1.56	29.6	16.89	35.97	5.32	23.15	5.66	1.53	5.86	0.92	5.48	1.13	3.27	3.09	0.47	71	22.5	0.74	10.03
CV12-FAR_25_01	CV12	Farellones	22-16 Ma	375953	6284829	60.55	0.92	17.97	6.22	0.13	2	5.2	1.84	4.81	0.35	3.25	3	11.04	2.27	44	440	2.55	454.8	18.2	94.4	0.39	4.65	190.7	5.31	5.39	1.56	29.6	16.89	35.97	5.32	23.15	5.66	1.53	5.86	0.92	5.48	1.13	3.27	3.09	0.47	71	22.5	0.74	10.03
EMPA	CV12	Farellones	22-16 Ma	375953	6284829	60.55	0.92	17.97	6.22	0.13	2	5.2	1.84	4.81	0.35	3.25	3	11.04	2.27	44	440	2.55	454.8	18.2	94.4	0.39	4.65	190.7	5.31	5.39	1.56	29.6	16.89	35.97	5.32	23.15	5.66	1.53	5.86	0.92	5.48	1.13	3.27	3.09	0.47	71	22.5	0.74	10.03
EMPA	CV12	Farellones	22-16 Ma	375953	6284829	60.55	0.92	17.97	6.22	0.13	2	5.2	1.84	4.81	0.35	3.25	3	11.04	2.27	44	440	2.55	454.8	18.2	94.4	0.39	4.65	190.7	5.31	5.39	1.56	29.6	16.89	35.97	5.32	23.15	5.66	1.53	5.86	0.92	5.48	1.13	3.27	3.09	0.47	71	22.5	0.74	10.03
EMPA	CV12	Farellones	22-16 Ma	375953	6284829	60.55	0.92	17.97	6.22	0.13	2	5.2	1.84	4.81	0.35	3.25	3	11.04	2.27	44	440	2.55	454.8	18.2	94.4	0.39	4.65	190.7	5.31	5.39	1.56	29.6	16.89	35.97	5.32	23.15	5.66	1.53	5.86	0.92	5.48	1.13	3.27	3.09	0.47	71	22.5	0.74	10.03
EMPA	CV12	Farellones	22-16 Ma	375953	6284829	60.55	0.92	17.97	6.22	0.13	2	5.2	1.84	4.81	0.35	3.25	3	11.04	2.27	44	440	2.55	454.8	18.2	94.4	0.39	4.65	190.7	5.31	5.39	1.56	29.6	16.89	35.97	5.32	23.15	5.66	1.53	5.86	0.92	5.48	1.13	3.27	3.09	0.47	71	22.5	0.74	10.03
EMPA	CV12	Farellones	22-16 Ma	375953	6284829	60.55	0.92	17.97	6.22	0.13	2	5.2	1.84	4.81	0.35	3.25	3	11.04	2.27	44	440	2.55	454.8	18.2	94.4	0.39	4.65	190.7	5.31	5.39	1.56	29.6	16.89	35.97	5.32	23.15	5.66	1.53	5.86	0.92	5.48	1.13	3.27	3.09	0.47	71	22.5	0.74	10.03
EMPA	CV12	Farellones	22-16 Ma	375953	6284829	60.55	0.92	17.97	6.22	0.13	2	5.2	1.84	4.81	0.35	3.25	3	11.04	2.27	44	440	2.55	454.8	18.2	94.4	0.39	4.65	190.7	5.31	5.39	1.56	29.6	16.89	35.97	5.32	23.15	5.66	1.53	5.86	0.92	5.48	1.13	3.27	3.09	0.47	71	22.5	0.74	10.03
EMPA	CV12	Farellones	22-16 Ma	375953	6284829	60.55	0.92	17.97	6.22	0.13	2	5.2	1.84	4.81	0.35	3.25	3	11.04	2.27	44	440	2.55	454.8	18.2	94.4	0.39	4.65	190.7	5.31	5.39	1.56	29.6	16.89	35.97	5.32	23.15	5.66	1.53	5.86	0.92	5.48	1.13	3.27	3.09	0.47	71	22.5	0.74	10.03
EMPA	CV12	Farellones	22-16 Ma	375953	6284829	60.55	0.92	17.97	6.22	0.13	2	5.2	1.84	4.81	0.35	3.25	3	11.04	2.27	44	440	2.55	454.8	18.2	94.4	0.39	4.65	190.7	5.31	5.39	1.56	29.6	16.89	35.97	5.32	23.15	5.66	1.53	5.86	0.92	5.48	1.13	3.27	3.09	0.47	71	22.5	0.74	10.03
EMPA	CV12	Farellones	22-16 Ma	375953	6284829	60.55	0.92	17.97	6.22	0.13	2	5.2	1.84	4.81	0.35	3.25	3	11.04	2.27	44	440	2.55	454.8	18.2	94.4	0.39	4.65	190.7	5.31	5.39	1.56	29.6	16.89	35.97	5.32	23.15	5.66	1.53	5.86	0.92	5.48	1.13	3.27	3.09	0.47	71	22.5	0.74	10.03
EMPA	CV12	Farellones	22-16 Ma	375953	6284829	60.55	0.92	17.97	6.22	0.13	2	5.2	1.84	4.81	0.35	3.25	3	11.04	2.27	44	440	2.55	454.8	18.2	94.4	0.39	4.65	190.7	5.31	5.39	1.56	29.6	16.89	35.97	5.32	23.15	5.66	1.53	5.86	0.92	5.48	1.13	3.27	3.09	0.47	71	22.5	0.74	10.03
EMPA	CV12	Farellones	22-16 Ma	375953	6284829	60.55	0.92	17.97	6.22	0.13	2	5.2	1.84	4.81	0.35	3.25	3	11.04	2.27	44	440	2.55	454.8	18.2	94.4	0.39	4.65	190.7	5.31	5.39	1.56	29.6	16.89	35.97	5.32	23.15	5.66	1.53	5.86	0.92	5.48	1.13	3.27	3.09	0.47	71	22.5	0.74	10.03
EMPA	CV12	Farellones	22-16 Ma	375953	6284829	60.55	0.92	17.97	6.22	0.13	2	5.2	1.84	4.81	0.35	3.25	3	11.04	2.27	44	440	2.55	454.8	18.2	94.4	0.39	4.65	190.7	5.31	5.39	1.56	29.6	16.89	35.97	5.32	23.15	5.66	1.53	5.86	0.92	5.48	1.13	3.27	3.09	0.47	71	22.5	0.74	10.03
EMPA	CV12	Farellones	22-16 Ma	375953	6284829	60.55	0.92	17.97	6.22	0.13	2	5.2	1.84	4.81	0.35	3.25	3	11.04	2.27	44	440	2.55	454.8	18.2	94.4	0.39	4.65	190.7	5.31	5.39	1.56	29.6	16.89	35.97	5.32	23.15	5.66	1.53	5.86	0.92	5.48	1.13	3.27	3.09	0.47	71	22.5	0.74	10.03
EMPA	CV12	Farellones	22-16 Ma	375953	6284829	60.55	0.92	17.97	6.22	0.13	2	5.2	1.84	4.81	0.35	3.25	3	11.04	2.27	44	440	2.55	454.8	18.2	94.4	0.39	4.65	190.7	5.31	5.39	1.56	29.6	16.89	35.97	5.32	23.15	5.66	1.53	5.86	0.92	5.48	1.13	3.27	3.09	0.47	71	22.5	0.74	10.03
EMPA	CV12	Farellones	22-16 Ma	375953	6284829	60.55	0.92	17.97	6.22	0.13	2	5.2	1.84	4.81	0.35	3.25	3	11.04	2.27	44	440	2.55	454.8	18.2	94.4	0.39	4.65	190.7	5.31	5.39	1.56	29.6	16.89	35.97	5.32	23.15	5.66	1.53	5.86	0.92	5.48	1.13	3.27	3.09	0.47	71	22.5	0.74	10.03
EMPA	CV12	Farellones	22-16 Ma	375953	6284829	60.55	0.92	17.97	6.22	0.13	2	5.2	1.84	4.81	0.35	3.25	3	11.04	2.27	44	440	2.55	454.8	18.2	94.4	0.39	4.65	190.7	5.31	5.39	1.56	29.6	16.89	35.97	5.32	23.15	5.66	1.53	5.86	0.92	5.48	1.13	3.27	3.09	0.47	71	22.5	0.74	10.03
EMPA	CV12	Farellones	22-16 Ma	375953	6284829	60.55	0.92	17.97	6.22	0.13	2	5.2	1.84	4.81	0.35	3.25	3	11.04	2.27	44	440	2.55	454.8	18.2	94.4	0.39	4.65	190.7	5.31	5.39	1.56	29.6	16.89	35.97	5.32	23.15	5.66	1.53	5.86	0.92	5.48	1.13	3.27	3.09	0.47	71	22.5	0.74	10.03
[truncated: 67 more columns]
